1 **IL-1 $\alpha$  secreted by subcapsular sinus macrophages promotes melanoma**  
2 **metastasis in the sentinel lymph node by upregulating STAT3 signaling in**  
3 **the tumor.**

4 Tommaso Virgilio<sup>1,2</sup>, Joy Bordini<sup>1,3</sup>, Giulio Sartori<sup>4</sup>, Irene Latino<sup>1</sup>, Daniel Molina-Romero<sup>1,5</sup>, Cristina  
5 Leoni<sup>1</sup>, Murodzhon Akhmedov<sup>1,6</sup>, Andrea Rinaldi<sup>4</sup>, Alberto J. Arribas<sup>4</sup>, Diego Morone<sup>1</sup>, S. Morteza  
6 Seyed Jafari<sup>7</sup>, Marina Bersudsky<sup>8</sup>, Aner Ottolenghi<sup>8</sup>, Ivo Kwee<sup>1,6</sup>, Anna Maria Chiaravalli<sup>9</sup>, Fausto  
7 Sessa<sup>9</sup>, Robert E. Hunger<sup>7</sup>, Antonino Bruno<sup>10</sup>, Lorenzo Mortara<sup>11</sup>, Elena Voronov<sup>8</sup>, Silvia Monticelli<sup>1</sup>,  
8 Ron N. Apte<sup>8</sup>, Francesco Bertoni<sup>4,12</sup>, Santiago F. Gonzalez<sup>1\*</sup>

9 1: Institute for Research in Biomedicine, Università della Svizzera Italiana, Bellinzona, Switzerland.

10 2: Graduate School for Cellular and Biomedical Sciences, University of Bern, Bern, Switzerland.

11 3: Genomsys SA, Lugano, Switzerland.

12 4: Institute of Oncology Research, Università della Svizzera Italiana, Bellinzona, Switzerland.

13 5: Graduate School Ecole Polytechnique Fédérale de Lausanne, Lausanne, Switzerland.

14 6: BigOmics Analytics, Lugano, Switzerland.

15 7: Department of Dermatology, Inselspital, Bern University Hospital, University of Bern, Bern, Switzerland.

16 8: The Shruga Segal Department of Microbiology, Immunology and Genetics, Faculty of Health Sciences, Ben-  
17 Gurion University of the Negev, Beer Sheva, Israel.

18 9: Unit of Pathology, ASST dei Sette Laghi, Department of Medicine and Surgery, University of Insubria, Varese,  
19 Italy

20 10: Laboratory of Innate Immunity, Unit of Molecular Pathology, Biochemistry, and Immunology, IRCCS  
21 MultiMedica, Milan, Italy.

22 11: Laboratory of Immunology and General Pathology, Department of Biotechnology and Life Sciences, University  
23 of Insubria, Varese, Italy

24 12: Oncology Institute of Southern Switzerland (IOSI), Bellinzona, Switzerland

25

26

27

28

29

30

31

32

33

34 **Corresponding Author:**

35 Santiago Fernandez Gonzalez

36 Institute for Research in Biomedicine, via Vincenzo Vela 6.

37 CH-6500 Bellinzona. Switzerland

38 Tel: (+41) 91 8200 360

39 Email: [santiago.gonzalez@irb.usi.ch](mailto:santiago.gonzalez@irb.usi.ch)

40 **ABSTRACT**

41

42 During melanoma metastasization, tumor cells originated in the skin migrate via lymphatic  
43 vessels to the sentinel lymph node (sLN) in a process that facilitates their spread across the  
44 body. Here, we characterized the innate inflammatory responses to melanoma metastasis in  
45 the sLN. For this purpose, we confirmed the migration of fluorescent metastatic melanoma  
46 cells to the sLN and we characterized the inflammatory response in the metastatic  
47 microenvironment. We found that macrophages located in the subcapsular sinus (SSM),  
48 produce pro-tumoral IL-1 $\alpha$  after recognition of tumor antigens. Moreover, we confirmed that  
49 the administration of an anti-IL-1 $\alpha$  depleting antibody reduced metastasis. Conversely, the  
50 administration of recombinant IL-1 $\alpha$  accelerated the lymphatic spreading of the tumor.  
51 Additionally, the elimination of the macrophages significantly reduced the progression of the  
52 metastatic spread. To understand the mechanism of action of IL-1 $\alpha$  in the context of the lymph  
53 node microenvironment, we applied single-cell RNA sequencing to dissected metastases  
54 obtained from animals treated with an anti-IL-1 $\alpha$  blocking antibody. Amongst the different  
55 pathways affected, we identified STAT3 as one of the main targets of IL-1 $\alpha$  signaling in  
56 metastatic cells. Moreover, we found that the anti-IL-1 $\alpha$  anti-tumoral effect was not mediated  
57 by lymphocytes, as IL-1R1 KO mice did not show any improvement in metastasis growth.  
58 Finally, we found a synergistic anti-metastatic effect of the combination of IL-1 $\alpha$  blocking and  
59 the STAT3 inhibitor (STAT3i) stattic. In summary, we described a new mechanism by which  
60 SSM support melanoma metastasis, highlighting a new target for immunotherapy.

61

62

63 **KEYWORDS:** *Melanoma, Metastasis, Sentinel Lymph Node, IL-1 $\alpha$ , STAT3,*  
64 *Macrophages, Subcapsular sinus, Immunotherapy, Inflammation.*

## 65 INTRODUCTION

66 Melanoma is the most lethal form of skin cancer and a serious threat for public health. In recent  
67 years, the incidence of this type of cancer has progressively increased and it is currently one  
68 of the most common malignancies in both adult and young individuals<sup>1</sup>. During melanoma  
69 development, malignant cells in the skin acquire genetic mutations that lead them towards the  
70 lymphatic vessels, which serve as a transportation system<sup>2</sup>. Once in the lymphatics, the  
71 metastatic cells initiate an active migration that leads them towards the sentinel LN (sLN)<sup>3</sup>.  
72 The presence of melanoma metastasis in this organ is indicative of a poor prognosis,  
73 drastically decreasing the survival rate of the patients<sup>4,5</sup>.

74  
75 Upon breaching the LN capsule, metastatic cells access the LN sinuses via the afferent  
76 lymphatics, following chemokine gradients generated by lymphatic endothelial cells<sup>6-8</sup>. The  
77 invasion of the sLN is initiated in the subcapsular sinus area (SS)<sup>6,8,9</sup> and progressively  
78 spreads towards the inner structures of the sLN<sup>10</sup>. This process facilitates the access of the  
79 metastatic cells to the bloodstream via high-endothelial venules (HEVs) and their consequent  
80 spread to distant organs<sup>11-13</sup>.

81  
82 The LN sinuses are populated by resident phagocytic cells, including three distinct  
83 macrophage subsets called subcapsular sinus macrophages (SSM), medullary macrophages  
84 (MM) and medullary cord macrophages (MCM), according to the area they reside<sup>14</sup>.  
85 Strategically positioned along the SS area, SSM are the first immune cells to encounter lymph-  
86 transported antigens and pathogens, preventing their systemic dissemination<sup>15</sup>. In addition,  
87 they play a critical role in the initiation of the immune responses against immune complexes  
88 and virus<sup>16-18</sup> as well as promoting humoral immunity<sup>19,20</sup>. Despite the role of macrophages  
89 against infectious pathogens has been largely demonstrated, their involvement in the  
90 response against tumor remains somehow controversial<sup>21-27</sup>. This is mainly due to the ability  
91 of these cells to activate either anti- or pro-tumoral responses, according to their cell plasticity,  
92 that allows them being dicotomically classified in M1 and M2 macrophages<sup>28,29</sup>. For instance,  
93 some authors have described a protective function of SSM, which was associated with the  
94 capturing of dead tumor cell-derived antigens<sup>23</sup> and their cross-presentation to CD8<sup>+</sup> T cells<sup>21</sup>.  
95 Moreover, Tacconi and colleagues have recently suggested a protective role of CD169<sup>+</sup> LN  
96 macrophages in breast cancer metastasis, which was dependent on the presence of B cells<sup>27</sup>.  
97 Conversely, other studies have revealed a pro-tumoral effect of these cells, mainly linked with  
98 their capacity to trigger and maintain the inflammatory response both in peripheral and  
99 lymphoid tissues<sup>9,30,31</sup>.

100

101 The inflammatory response plays a fundamental role in the behavior of cancer cells. Some  
102 cancers, including melanoma, are able indeed to grow in chronically inflamed conditions and  
103 to take advantage of inflammation<sup>32-35</sup>. One of the mechanisms by which innate inflammation  
104 supports tumor growth is by the release of IL-1 family cytokines<sup>36,37</sup>. IL-1 $\beta$ , the major  
105 component of this family, has been shown to endorse different tumors, mainly by mediating  
106 immune suppression and by activating endothelial cells<sup>38,39</sup>. Indeed, recent evidence suggests  
107 that blocking the IL-1R signaling might prolong the survival time of patients with different  
108 tumors<sup>40-44</sup>. In addition, IL-1 $\beta$  antagonism can synergize with immune checkpoint inhibitor  
109 therapy<sup>38</sup>. However, the mechanisms responsible for this process might vary between the  
110 primary tumor and the metastatic areas, including the sLN<sup>45,46</sup>. Understanding these  
111 differences will influence the design of specific immunotherapies intended to control tumor  
112 dissemination in both locations<sup>47,48</sup> and in different types of tumors, including melanoma<sup>49,50</sup>.

113

114 In the present work we characterized the innate immune response of the sLN to melanoma  
115 metastasis invasion. Furthermore, we identified a novel mechanism that associates the  
116 inflammatory reaction, initiated by SSM, to the progression of the metastatic melanoma cells.  
117 These results will have a potential impact generating new therapies and improving the  
118 efficiency of the current immunotherapies against metastatic melanoma, possibly acting on  
119 macrophages, that represent the most abundant inflammatory cells infiltrating tumor.

## 120 RESULTS

### 121 ***Development and characterization of a murine model of melanoma metastasis in the*** 122 ***draining popliteal lymph node.***

123 To study the metastatic process in the sentinel lymph node  
124 (sLN) we transduced the melanoma cell line B16-F1 with a lentiviral vector codifying for  
125 mCherry and we characterized the expression of this fluorescent protein by FACS and  
126 microscopy (Fig. 1A and Supp. Fig. 1A, respectively). The primary tumor was induced by  
127 subcutaneous injection of the cancer cells in the mouse footpad, similarly to what was  
128 previously reported (Fig. 1B)<sup>51</sup>. Next, the formation of the primary tumor was monitored by  
129 measuring tumor volume (Supp. Fig. 1B,C) and tumor fluorescence was quantified by using  
130 the *In Vivo* Imaging System (IVIS; Fig. 1C,D). Following this approach, we observed a  
131 significant engraftment starting from week one post tumor implantation (p.t.i) (Fig. 1D).  
132 Subsequently, we identified macrometastases in the sLN at three weeks p.t.i. (Fig. 1E). To  
133 study in more detail the progression of melanoma cells towards the sLN, we employed flow  
134 cytometry, observing a significant increase of the metastatic cells at day 15 p.t.i. compared to  
135 control samples (Fig 1F). In addition, to characterize the area of the metastasis, we used  
136 confocal microscopy analysis of the sLN at different time points following tumor induction (Fig.  
137 1G). We measured a significant increase in the metastatic area starting at two weeks (Fig.  
138 1H). Besides, the morphology of sLN metastases showed that, in concordance with previous  
139 works in humans<sup>8</sup>, metastatic cells initially invade the subcapsular sinus area (SS) (Fig. 1G,I).  
140 Furthermore, at later time points, the metastasis progressively expanded through the  
141 interfollicular area (IF), invading the transverse sinus (Fig. 1I, Sup Fig. 1D). Conversely, we  
142 did not observe the presence of metastatic cells in distant organs, such as the spleen or the  
143 lungs, at equivalent time points (Fig. 1J), confirming the lymphatic dissemination of the tumor.

### 144 ***IL-1 $\alpha$ promotes melanoma growth in the sLN.***

145 To characterize the inflammatory reaction  
146 induced by metastasis development, we quantified the total number of immune cells infiltrated  
147 in the sLN, observing a significant two-fold increase starting from the first week p.t.i. (Fig. 2A).  
148 More in detail, increases in dendritic cells (MHC-II<sup>+</sup>, CD11c<sup>high</sup>, CD11b<sup>+</sup> and CD11b<sup>-</sup>), NK cells  
149 (CD3<sup>-</sup>, NK1.1<sup>+</sup>), neutrophils (MHC-II<sup>-</sup>, GR1<sup>high</sup>), monocytes (MHC-II<sup>-</sup>, GR1<sup>int</sup>) and macrophages  
150 (MHC-II<sup>+</sup>, CD11c<sup>intlow</sup>, CD11b<sup>+</sup>, Supp. Fig. 2A), as well as B (B220<sup>+</sup>) and T cells (CD4<sup>+</sup>, CD8<sup>+</sup>,  
151 and FOXP3<sup>+</sup> T<sub>reg</sub>), were observed (Supp. Fig. 2B). To further characterize the recruitment of  
152 immune cells to the metastasized sLN, a multiplexed approach was applied to quantify the  
153 concentration of different inflammatory chemokines, including CXCL13, CXCL9, CCL22,  
154 CCL5 and CCL2, in the sLN supernatant, observing a significant increase at week three p.t.i.  
155 (Supp. Fig. 2C). Additionally, we measured the concentration of other 13 inflammatory  
cytokines. Among the molecules analyzed, IL-1 $\alpha$  exhibited a significant increase at week three

156 p.t.i., compared to the control group. (Fig. 2B). A further study of the dynamics of IL-1 $\alpha$  release  
157 highlighted that the upregulation started at week two p.t.i. (Fig. 2C). To evaluate if IL-1 $\alpha$   
158 secretion was associated with other tumor models, including another solid tumor infiltrating  
159 the sLN, we measured the level of this cytokine in sLN metastasized with melanoma B16-F10,  
160 or with the breast cancer cell line E0771, observing similar levels of IL-1 $\alpha$  in both models at  
161 three weeks p.t.i. (Fig. 2D).

162 Next, we hypothesized a pro-tumoral role of IL-1 $\alpha$  in the metastatic context. To explore this  
163 hypothesis, we treated mice with a daily subcutaneous injection of either IL-1 $\alpha$  depleting  
164 antibody or recombinant IL-1 $\alpha$  protein. Interestingly, blocking the IL-1 $\alpha$  pathway by  
165 administration of the neutralizing antibody significantly decreased the metastasis growth in the  
166 sLN, as indicated by a reduction in the number of metastatic cells measured by flow cytometric  
167 analysis at week three p.t.i.. Conversely, the number of melanoma cells significantly increased  
168 in the sLN treated with recombinant IL-1 $\alpha$  at equivalent time points (Fig. 2E). Moreover, the  
169 metastatic ratio, defined as the number of mice developing sLN metastasis at week three p.t.i.  
170 divided by the total number of mice showing primary tumor engraftment, was higher in the  
171 animals treated with recombinant IL-1 $\alpha$  and it was reduced following IL-1 $\alpha$  depletion (Fig. 2F).  
172 Nevertheless, the observed variation in the metastasis size after treatment could be  
173 dependent on the size of the primary tumor. Therefore, to discard that possibility, we  
174 normalized the number of metastatic cells to the primary tumor volume, confirming the results  
175 previously observed in Fig. 2E (Supp. Fig. 2D). Additionally, the previously described  
176 treatments did not have a significant effect on the growth of the primary tumor in comparison  
177 to the untreated control group (Supp. Fig. 2E). However, we observed that IL-1 $\alpha$  KO mice  
178 showed a reduction not only of the metastatic cells at week three p.t.i. (Fig. 2G), but also of  
179 the primary tumor volume starting from the fourth week p.t.i. (Supp. Fig. 2F). This discrepancy  
180 could be partially explained by the mode of administration of the treatment, which promotes  
181 the transport towards the draining lymphatics, or by the time of administration of the  
182 compounds in comparison to the constant absence of IL-1 $\alpha$  in the tumor microenvironment in  
183 KO mice.

184

185 ***Subcapsular sinus macrophages are the main source of pro-tumoral IL-1 $\alpha$  and***  
186 ***disappear after tumor phagocytosis.*** In a previous study we characterized the role of LN  
187 macrophages as the main producers of IL-1 $\alpha$  in the LN, following influenza vaccination<sup>20</sup>. To  
188 elucidate the main source of IL-1 $\alpha$  in the melanoma model, we analyzed the infiltrating immune  
189 cells from the metastatic regions of the LN, by single cell RNA sequencing (scSeq, Fig. 3A).  
190 Following this approach, we confirmed that LN macrophages are the main producers of IL-1 $\alpha$   
191 (Fig. 3 B, C). Moreover, the depletion of this population, following the injection with clodronate

192 liposomes (CLL), significantly reduced the levels of IL-1 $\alpha$  in the LN supernatant (Fig 3D).  
193 Importantly, depletion of macrophages following CLL administration completely abrogated the  
194 growth of the metastatic melanoma cells in the LN, confirming their pro-tumoral nature (Supp.  
195 Fig. 3A, B). However, the local administration of CLL did not affect the volume of the primary  
196 tumor (Supp. Fig 3C). Next, to identify the specific subset of macrophages responsible for the  
197 production of IL-1 $\alpha$ , we used flow cytometry (Fig. 3E, F) and confocal microscopy (Fig. 3G),  
198 which pointed out SSM (CD169<sup>+</sup>, F4/80<sup>-</sup>) as the main source of IL-1 $\alpha$  in the metastatic region.  
199 To prove the relevance of these findings also in humans, we performed immunohistochemical  
200 staining of melanoma metastatic LN from patients, confirming that the local production of IL-  
201 1 $\alpha$  was associated with CD68<sup>+</sup> tumor infiltrated macrophages in the SS region (Supp. Fig. 3D).  
202 As suggested by other studies<sup>23</sup>, we also reported that tumor infiltrating SSM phagocyte  
203 melanoma cells (Fig. 3G, H, Supp. Fig. 3E, Supp. Mov. 1).

204 To investigate the mechanism of release of IL-1 $\alpha$  by SSM, we quantified cell numbers by flow  
205 cytometry, observing that the total number of SSM remained constant during the first three  
206 weeks p.t.i. (Supp. Fig. 3F), while their frequency decreased (Supp. Fig. 3G). This was in  
207 contrast with a significant increase in the total number of macrophages observed at equivalent  
208 time points (Supp. Fig. 2A). Therefore, to investigate if SSM disappear following metastasis  
209 growth, we quantified by confocal microscopy the expression of the macrophage marker  
210 CD169 in different regions of the metastatic sLN. Interestingly, we observed that the CD169  
211 layer in the SS was absent in the proximity of the metastatic area (Fig. 3I). More in detail,  
212 CD169 in the SS surrounding the metastatic region was expressed significantly less than in  
213 the non-metastasized SS (Fig. 3J), suggesting that SSM in direct contact with melanoma might  
214 undergo a cell death process. To confirm that the phagocytosis of tumor cell debris was able  
215 to induce SSM disappearance we injected B16-F1 lysate in the mouse footpad and performed  
216 flow cytometric analysis at 12 and 24 h following injection. We observed that the percentage  
217 of SSM significantly decreased compared with non-injected controls (Supp. Fig. 3H).

218

### 219 ***SSM-derived IL-1 $\alpha$ induces melanoma proliferation.***

220 In previous studies, we have demonstrated the involvement of IL-1 $\alpha$  in the inflammatory  
221 reaction in the LN<sup>20,52</sup>. However, we did not observe here any significant effect in the  
222 recruitment of the major immune cells subtypes in the sLN following treatment with anti-IL-1 $\alpha$   
223 (Supp. Fig. 4 A, B). To further characterize the pro-tumoral mechanism of IL-1 $\alpha$ , we measured  
224 the expression of IL-1R1, the only known receptor involved in the signaling of IL-1 $\alpha$ <sup>39</sup>, in the  
225 infiltrated cell types of a metastatic sLN. Amongst the evaluated cells, NK cells and melanoma  
226 displayed the highest level of IL-1R1 expression (Fig. 4A). To clarify the role of immune cells  
227 in mediating the pro-tumoral function of IL-1 $\alpha$ , we induced melanoma in IL-1R1 KO mice, in

228 which tumor microenvironment cells can't be involved in IL-1 signaling and only the tumor cells  
229 express this receptor. The absence of IL-1R1 in the immune compartment did not significantly  
230 affect neither the metastasis growth in the sLN (Fig. 4B) nor the metastatic ratio (Fig. 4C),  
231 demonstrating that the pro-tumoral effect of IL-1 signaling was not associated with the immune  
232 cell response. Next, after confirming the expression of IL-1R1 in cultured melanoma cells  
233 (Supp. Fig. 4C), we measured their proliferation rate following exposure to IL-1 $\alpha$ . We  
234 discovered that IL-1 $\alpha$  significantly promoted the proliferation of melanoma in murine and  
235 human cell lines (Fig. 4D and 4E, respectively). To further characterize the activation of IL-  
236 1R1 signaling in B16-F1 melanoma cells, we measured by qPCR the expression of the gene  
237 codifying for the Myeloid Differentiation Primary Response 88 protein (MYD88), the main  
238 mediator of the Interleukin-1 receptor associated kinase (IRAK) signaling activated by IL-  
239 1R1<sup>39</sup>. The results confirmed that melanoma cells treated with recombinant IL-1 $\alpha$  significantly  
240 upregulated the *Myd88* gene (Fig. 4F).

241

242 ***IL-1 $\alpha$  promotes aggressiveness of melanoma metastasis via STAT3.*** To study the  
243 pathways influenced by IL-1 $\alpha$  blocking *in vivo*, we performed scSeq of dissected metastases  
244 from mice treated with anti-IL-1 $\alpha$  antibody at three weeks p.t.i. (Supp. Fig. 5A). Next, we  
245 performed an influence analysis on the transcriptomic scSeq data (Fig. 5A) to identify the top  
246 ten IL-1 $\alpha$  key players, defined as the genes with the highest influence from all the *il1a* related  
247 pathways (Fig. 5B). Amongst them, we focused on *STAT3*, which was the most differentially  
248 expressed gene among the *il1a* key players following IL-1 $\alpha$  depletion (Fig. 5C). This gene  
249 codifies for the transcription factor STAT3, a well characterized mediator of aggressiveness in  
250 different cancers, including melanoma<sup>53,54</sup>. Furthermore, scSeq analysis of STAT3 expression  
251 highlighted the metastatic melanoma as the cells exhibiting the highest expression levels of  
252 this transcription factor (Fig. 5D). Moreover, the induction of the *STAT3* gene in melanoma  
253 cells by IL-1 $\alpha$  was confirmed *in vitro* by the administration of recombinant IL-1 $\alpha$  (Fig. 5E). To  
254 recapitulate this mechanism at a functional level, we studied STAT3 protein expression and  
255 phosphorylation in murine melanoma cells using immunoblot assay. Treatment with  
256 recombinant IL-1 $\alpha$  induced a significant overexpression of STAT3 in comparison to untreated  
257 controls starting at 24 h post IL-1 $\alpha$  administration, while the addition of the anti-IL-1 $\alpha$  depleting  
258 antibody reverted this phenotype (Fig. 5F). Furthermore, exposure to recombinant IL-1 $\alpha$   
259 induced the phosphorylation of STAT3, which was prevented by the depletion treatment (Fig.  
260 5G). To evaluate if this mechanism was also present in a human model, we quantified STAT3  
261 and pSTAT3 in the A375 cell line post administration of human recombinant IL-1 $\alpha$ , and we  
262 observed a significant increase of both total and phosphorylated forms in comparison to  
263 untreated controls (Fig. 5H and 5I, respectively). Moreover, IHC sections of sLN from human



264 patients confirmed the expression and phosphorylation of STAT3 in the metastatic lesions  
265 (Supp. Fig. 5B, C). Once we confirmed the connection between IL-1 $\alpha$  and STAT3, we  
266 evaluated if a therapy with a STAT3 inhibitor (STAT3i) was able to improve the efficiency of  
267 the previously described IL-1 $\alpha$  blocking therapy in the model of metastatic melanoma. Firstly,  
268 we observed that the administration of the combined therapies *in vivo* was able to contain the  
269 growth of the metastases more effectively than each of the two individual treatments (Fig. 5J).  
270 Additionally, we evaluated the combinatorial effect of these two therapies using an *in vitro*  
271 system, which highlighted a synergistic effect of the anti-IL-1 $\alpha$  blocking therapy combined with  
272 the STAT3i static (Fig. 5K, Supp. Fig. 5D, E). In more detail, the addition of static improved  
273 both the efficacy (Supp. Fig. 5F) and the potency (Supp. Fig. 5G, H) of the IL-1 $\alpha$  blocking  
274 therapy.

275

## 276 DISCUSSION

277 In the present work, we characterized the innate immune responses of the sLN to melanoma  
278 metastasis invasion. We discovered that the SSM, which are the first immune cells to  
279 encounter melanoma metastasis in the sLN, phagocytosed malignant cells and released IL-1 $\alpha$ .  
280 Rather than triggering a tumor-killing inflammation, this cytokine increased metastatic cells  
281 aggressiveness by promoting STAT3 phosphorylation and increasing cancer proliferation.  
282 Importantly, blocking IL-1 $\alpha$  decreased metastatic growth and cooperated synergistically with  
283 STAT3 inhibition.

284

285 STAT3 is a transcriptional factor with a relevant role in melanoma progression<sup>55</sup>, together with  
286 relevant immunosuppressive and pro-angiogenic properties<sup>56,57</sup>. Diverse studies investigated  
287 the STAT3 pathway and its activation by IL-6<sup>58</sup>. Of note, no studies reported similar effects of  
288 IL-1 $\alpha$ . Based on this gap of knowledge, we stress a new target for metastatic melanoma  
289 therapy, acting on STAT3 signaling. This finding has further relevance in the context of  
290 combined therapies, which represent a very promising approach to target cancer cells at  
291 different levels, including tumor microenvironment<sup>59,60</sup>. In this context, blocking multiple  
292 immune pathways, such as IL-1 $\alpha$  and IL-6, might improve the efficacy of STAT3i in comparison  
293 to single or dual therapy, as suggested by other studies indicating the synergistic effect of  
294 these two cytokines<sup>36</sup>. In addition, considering the variability of cytokines levels and responses  
295 to cytokines-based therapies in patients<sup>61</sup>, IL-1 $\alpha$  blockade could be envisaged as an  
296 alternative to IL-6 inhibition for boosting STAT3i<sup>62</sup> in those patients with low levels of IL-6 and  
297 low sensitivity to IL-6 depletion<sup>63</sup>. The specific cytokines expression profiling in patients, in  
298 fact, might be a useful tool to predict the patient response to the treatment and to design the  
299 best therapeutic strategy, according to the concept of personalized medicine, as previously

300 proposed<sup>64–66</sup>. Moreover, IL-1 $\alpha$  blocking agents have already been tested in clinical trials on  
301 patients with various tumors and with different grading, showing variable efficiency<sup>41,42,44,64</sup>.  
302 Moreover, previous evidence, described a possible connection between PD-1 and IL-1<sup>38,67</sup> or  
303 STAT3<sup>57,68</sup> in various tumors, indicating that IL-1 $\alpha$  blockade in combination with other  
304 therapies, including checkpoint inhibitors, might be object of further studies.

305 Another important aspect of the present work is the focus on metastasization. Metastases are  
306 in fact more dangerous than primary tumors for patients, especially in melanoma<sup>69</sup>. Moreover,  
307 their biology might differ substantially from the primary tumor<sup>70</sup>. For instance, STAT3 favors  
308 the spread of melanoma cells to distant organs, and it is particularly expressed in the  
309 melanoma metastasis<sup>53,54</sup>. For this reason, the identification of the IL-1 $\alpha$  – STAT3 axis, able  
310 to address efficiently metastases at their first stage, gains particular clinical relevance<sup>48,71</sup>.  
311 Furthermore, the pro-tumoral effect of SSM over the metastatic melanoma might be  
312 associated with the more aggressive phenotype acquired by these cells in comparison to the  
313 primary tumor or to peripheral blood circulating melanoma cells<sup>11,12</sup>. However, other  
314 mechanisms, such as, for instance, the lymph-mediated protection from ferroptosis<sup>13</sup>, are also  
315 involved in this process.

316

317 In this study, we clearly characterized the pro-tumoral activity of SSM during melanoma  
318 metastasis. However, previous evidence reported controversial functions of SSM in tumor  
319 biology<sup>9,25,72</sup>. These cells, indeed, belong to the family of macrophages, which are capable of  
320 activating both pro- and anti- tumoral mechanisms, as a consequence of their cellular  
321 plasticity<sup>73</sup>. For this reason, targeting a specific pathway, as we proposed here, might reveal  
322 a better strategy than depleting the whole macrophage population, avoiding the hampering of  
323 possible anti-metastatic functions of these cells<sup>23,24,74</sup>. Similarly, the development of drugs  
324 capable of targeting specifically SSM might reveal useful to block the IL-1 $\alpha$  – STAT3 axis only  
325 in these cells and to boost their anti-tumoral properties, in a process of macrophages re-  
326 polarization<sup>75</sup>. Unfortunately, despite recent studies described compounds capable of  
327 localizing differentially in the SCS and in the medullary area of the LN, a therapy able to  
328 differentiate specifically macrophage subsets in the LN is still missing <sup>72,76,77</sup>.

329

330 Additionally, SSM initiate the inflammatory response in the sLN by different mechanisms,  
331 including cell death associated with the release of pre-stored IL-1 $\alpha$ <sup>20,78</sup>, which functions as an  
332 alarmin molecule following release from dying cells<sup>79</sup>. However, despite we observed a  
333 prominent recruitment of immune cells, we have not detected an efficient tumor-killing.  
334 Different hypotheses could explain this observation, including but not limiting to the exhaustion  
335 of the innate immunity, a higher affinity for IL-1 $\alpha$  in melanoma cells in comparison to immune

336 cells, or a specific inhibition of IL-1R1 by IL-1R antagonist in the immune compartment, which  
337 has been previously suggested in a study in human patients<sup>80</sup>. These and other hypotheses  
338 will furnish exciting insights on novel methods to improve immunotherapy and should be  
339 investigated in the future.

340

341 In conclusion, our results provide evidence of a novel function of SSM in melanoma metastasis  
342 progression by controlling the IL-1 $\alpha$  – STAT3 axis. Importantly, IL-1 $\alpha$  blocking decreased  
343 metastasis growth and acted synergistically with a STAT3i in controlling tumor growth. Taken  
344 together, these findings provide with new opportunities to improve currently available  
345 immunotherapies against metastatic melanoma.

## 346 **MATERIALS AND METHODS**

### 347 **Cell culture and lentiviral transduction**

348 B16-F1, B16-F10 and A375 cell lines were provided, respectively, by G. Guarda (IRB,  
349 Bellinzona) and C. Catapano (IOR, Bellinzona). E0771 cell lines were acquired from Ch3  
350 BioSystems. All cell lines were maintained in a complete RPMI medium (RPMI+Hepes, 10 %  
351 heat inactivated FBS, 1 % Glutamax, 1 % sodium pyruvate, 1 % non-essential amino acids,  
352 50 units/mL Penicillin, 50 µg/mL Streptomycin and 50 µM β-mercaptoethanol) and regularly  
353 tested for mycoplasma (MycoAlert Mycoplasma Detection kit, Lonza). The B16-F1-mCherry  
354 and B16-F1-Azurite cell lines were generated by lentiviral transduction. Briefly, lentiviral  
355 plasmids pSicoR-Ef1a-mCh (Addgene 31847) or pLV-Azurite (Addgene 36086) were  
356 transfected in HEK293T cells with packaging vectors pMD2G and psPAX (Addgene 12260  
357 and 12259) to generate viral particles. After concentration by centrifugation, the virus was  
358 later collected and used for B16-F1 transduction. Transduced fluorescent cells were selected  
359 by live cells sorting using BD FACSAria Sorter.

### 360 **Mice**

361 The Institute for Research in Biomedicine (IRB) hosted animal experiments in facilities defined  
362 as specific pathogen-free facilities, according to FELASA guidelines. Experiments involving  
363 IL-1α KO mice were conducted at the Ben Gurion University animal facility. In both facilities  
364 mice were housed in Individually Ventilated Cages (IVC) with controlled light : dark cycle (12  
365 : 12), room temperature (20 - 24 °C) and relative humidity (30 - 70 %). Animal caretakers,  
366 researchers and veterinarians provided mice with daily check of general health conditions. All  
367 animal experiments have been conducted in accordance with the Swiss Federal Veterinary  
368 Service guidelines and the Israel Animal Welfare Act. All mouse procedures have been  
369 previously authorized by the relevant institutional committee (Commissione Cantonale per gli  
370 Esperimenti sugli Animali) of the Cantonal Veterinary Office and by the by the Israeli Council  
371 for Animal Experimentation of the Ministry of Health, with licensing numbers TI 25/2017, TI  
372 24/2018, TI 55/2018 and TI 30/2020. Charles River Laboratories, F. Sallusto (IRB, Bellinzona)  
373 and R. Apte (BGU, Be'er Sheva) provided, respectively, C57BL/6J, B6.129S7-II1r1tm1Imx/J  
374 (IL-1R1KO/KO, Jackson code 003245) and IL-1α KO mice<sup>81</sup>, which were then bred in-house.  
375 B6.129P2(Cg)-Cx3cr1tm1Litt/J (CX3CR1GFP/wt) mice were originally acquired from Jackson  
376 Laboratories (cat 005582) and bred in-house. The genotype of all mice was confirmed as  
377 previously described<sup>82,83</sup>. Mice in an age range of 6 - 12 weeks, showing good health  
378 conditions and no abnormal clinical signs took part in the experiments. Equal numbers of  
379 males and females were assigned to experimental groups through a statistical randomization  
380 process. Power calculation per groups size determination, performed by using R software (R:  
381 A Language and Environment for Statistical Computing, R Core Team, R Foundation for

382 Statistical Computing, Vienna, Austria), estimated a number of 10 animals per group to obtain  
383 > 99 % statistical power.

#### 384 **Allograft model**

385  $10^6$  cells from the syngeneic cell lines B16-F1, B16-F10 and E0771 were injected  
386 subcutaneously in the right footpad in 10  $\mu$ L sterile PBS. Mice were anesthetized with  
387 Isoflurane (5 % for induction, 3 % for maintenance,  $FiO_2 = 1$ , 1 L/min) and monitored, after  
388 cells injection and anesthesia recovery, to check for absence of pain or impaired movement.  
389 Mouse body weight and tumor size were measured every one or two days. Tumor volume was  
390 calculated with the formula  $V = (\text{length} \times \text{width}^2) / 2$  and mice were euthanized when tumor  
391 reached 250  $\text{mm}^3$ . Euthanasia was performed by isoflurane overdose followed by cervical  
392 dislocation and immediate organs collection. We excluded from experiments mice which did  
393 not develop tumor ( $V = 0 \text{ mm}^3$  at day 20 p.t.i.) or which developed tumor in the popliteal fossa,  
394 impeding the collection of the popliteal lymph node. In some experiments, we injected 15  $\mu$ L  
395 of the B16-F1 tumor cell lysate originated from  $5 \times 10^5$  cells, sonicated at constant cycles of  
396 30 seconds.

#### 397 ***In vivo* treatments**

398 To maximize the specific effect of treatments on LN metastases and to minimize the effect on  
399 tumor engraftment and primary tumor growth, all treatments were administered when the  
400 primary tumor reached a size of 40  $\text{mm}^3$ , which corresponds to the time of arrival of the first  
401 metastatic cells to the LN. Additionally, all local treatments were injected in the calf, to minimize  
402 their distribution to the primary tumor. All treatments were resuspended in a maximum volume  
403 of 10  $\mu$ L in calcium- and magnesium-free PBS (PBS<sup>-</sup>). After injection in the subcutis, mice  
404 were recovered from anesthesia and monitored for absence of any sign of pain in the foot.  
405 Carrier-free recombinant mouse IL-1 $\alpha$  (Biolegend) was locally administered at a dose of 1  $\mu$ g  
406 / 10  $\mu$ L per day. The anti-mouse IL-1 $\alpha$  monoclonal antibody (InVivoMAb anti-mouse IL-1 $\alpha$ ,  
407 clone ALF-161, BioXCell) was administered to deplete IL-1 $\alpha$  at a dose of 200  $\mu$ g i.v. plus 60  
408  $\mu$ g locally, as previously reported<sup>20</sup>. Depletion was then maintained with a daily local injection  
409 of 60  $\mu$ g. STAT3 was inhibited by local injection of stattic (SelleckChem) 3.75 mg/kg every two  
410 days. Stattic was reconstituted, according to manufacturer's instructions, in 5 % DMSO  
411 (VWR), 40 % PEG300 (MedChem Express), 5 % Tween® 80 (Sigma-Aldrich) and 50 %  
412 distilled water. For macrophages depletion, mice received locally 10  $\mu$ L of clodronate- or PBS-  
413 containing liposomes (Liposoma), followed by a second dose two days later.

#### 414 **IVIS**

415 To monitor primary tumor growth and mCherry expression of fluorescent cancer cells, we used  
416 the IVIS Spectrum Imaging System (Caliper LifeSciences). Mice were anesthetized with  
417 isoflurane as above described to measure epifluorescence. Immediately after image

418 acquisition, animals were recovered from anesthesia. Images were later analyzed using Living  
419 Image Software 4.2 (Caliper LifeSciences).

#### 420 **Immunofluorescence and immunohistochemistry**

421 For mouse microscopy experiments, organs were fixed immediately after collection in 4 %  
422 paraformaldehyde (Merck-Millipore) for 12 h at 4 °C, then washed in calcium- and magnesium-  
423 free PBS (PBS-) and embedded in 4 % Low Gelling Temperature Agarose (Sigma-Aldrich).  
424 50 µm sections were cut with a vibratome (VT1200S, Leica). Slices were stained in a blocking  
425 buffer composed of TritonX100 (VWR) 0.1-0.3 %, BSA 5% (VWR) and fluorescently labelled  
426 antibodies at proper concentration, all diluted in PBS supplemented with calcium and  
427 magnesium (PBS+). After 72 hours of incubation at 4 °C, samples were washed in 0.05 %  
428 Tween® 20 (Sigma-Aldrich), post-staining fixed with PFA 4 %, washed in PBS- and mounted  
429 on glass slides. Confocal images were acquired using a Leica TCS SP5 microscope with a 20  
430 x 0.7 oil objective. To quantify the rate of invasion of melanoma in each sLN region, we first  
431 identified metastatic mass on the mCherry channel with an automatic Otsu threshold, after  
432 noise filtering with ImageJ Despeckle plugin and size filtering for regions bigger than 30 µm<sup>2</sup>.  
433 LN regions were manually identified based on CX3CR1 and CD21/35 morphology. Next, we  
434 quantified the total tumor area and the percentage of overlap of metastasis with each other  
435 LN region, respectively. Sample sizes were distributed as follows: n = 21, 7 and 11 for week  
436 one, two and three p.t.i., respectively. To quantify the expression of CD169<sup>+</sup>, the LN regions  
437 were manually identified as described above and the mean fluorescence intensity of each  
438 region was later calculated. To stain IL-1α in human lymph nodes, samples were stained using  
439 the BOND-III fully automated IHC/ISH stainer (Leica Biosystems) according to the  
440 manufacturer's instructions. To stain STAT3 and pSTAT3, primary antibodies (mouse anti-  
441 Stat3, clone 124H6, and mouse anti-Phospho-Stat3, Tyr705, clone M9C6, Cell Signaling)  
442 were incubated overnight at 4°C and the MACH4 Universal HRP-Polymer Detection System  
443 (Biocare Medical) was applied according to the manufacturer's protocol. 3D cell reconstruction  
444 was performed using Imaris Cell Imaging Software (Oxford Instruments).

#### 445 **Flow Cytometry**

446 LNs were collected, disrupted with tweezers, and enzymatically digested for 10 minutes at 37  
447 °C. DNase I (0.28 mg/mL, VWR), dispase (1 U/mL, Corning) and collagenase P (0.5 mg/ml,  
448 Roche) were resuspended in calcium- and magnesium-free PBS (PBS-). Digestion was  
449 stopped using a solution of 2 mM EDTA (Sigma-Aldrich) and 2 % heat-inactivated filter-  
450 sterilized fetal calf serum (Thermo Fisher Scientific) diluted in PBS- (Sigma-Aldrich). Fc  
451 receptors were blocked (αCD16/32, BioLegend) followed by surface staining and analyzed by  
452 flow cytometry on an LSRFortessa or FACSymphony (BD Biosciences). For IL-1α detection,  
453 intracellular staining was performed with a dedicated kit (88/8824/00, eBioscience), following

454 the manufacturer's instructions. Data were analyzed using FlowJo software (FlowJo LLC). To  
455 measure cytokines and chemokines expression in the LN, LEGENDPlex assays (Mouse  
456 Proinflammatory Chemokine Panel and Mouse Inflammation Panel; BioLegend) were used.  
457 Briefly, pLNs were collected and carefully disrupted in 75  $\mu$ L ice-cold phosphate buffer,  
458 minimizing cell rupture. The suspension was centrifuged at 100 rcf for 5 minutes and the  
459 supernatant was collected. 25  $\mu$ L supernatant was used for cytokines and chemokines  
460 detection. Samples were analyzed by flow cytometry on an LSRFortessa or FACSymphony  
461 (BD Biosciences) and data were analyzed using LEGENDPlex software (BioLegend).

## 462 **Antibodies**

463 The list of antibodies used to stain mouse samples includes anti-CD21/35 (CR1/CR2, clone  
464 7E9, BioLegend), anti-podoplanin (clone eBio8.1.1, Invitrogen), anti-CD3 (clone 17A2,  
465 BioLegend), anti-B220 (CD45R, clone RA3-6B2, BioLegend), anti-Gr-1 (clone RB6-8C5,  
466 BioLegend), anti-NK1.1 (clone PK136, BioLegend), anti-MHC II (I-A/I-E, clone M5/114.15.2,  
467 BioLegend), anti-CD11b (clone M1/70, BioLegend), anti-CD11c (clone N418, BioLegend),  
468 anti-F4/80 (clone BM8, BioLegend), anti-CD169 (Siglec-1, clone 3D6.112), anti-IL-1R1 (clone  
469 FAB7712N, R&D Systems), anti-IL-1 $\alpha$  (clone ALF-161, BioLegend; clone REA288, Miltenyi  
470 Biotec), anti-CD4 (clone RM4-5, BioLegend), anti-CD8a (clone 53-6.7, Invitrogen), anti-CD25  
471 (clone PC61, BioLegend). Human samples were stained with anti-IL-1 $\alpha$  (clone OT12F8, Novus  
472 Biologicals), and anti-CD68 antibodies (clone PG-M1, Dako).

## 473 **Single-cell RNA-sequencing**

474 Metastatic LN were obtained from four PBS injected mice, six tumor-bearing mice and four  
475 tumor-bearing mice treated with anti-IL-1 $\alpha$  as described above. Metastases from tumor-  
476 bearing mice were microsurgically dissected using sterile micro-surgical tools. SS, IF and F  
477 regions were dissected in negative controls. Later, samples were disrupted into single cell  
478 suspension as described for flow cytometry, using sterile nuclease-free tools. Single cells were  
479 barcoded using the 10x Chromium Single Cell platform, and cDNA libraries were prepared  
480 according to the manufacturer's protocol (Single Cell 3' v3, 10x Genomics, USA). In brief, cell  
481 suspensions, reverse transcription master mix and partitioning oil were loaded on a single cell  
482 chip, then run on the Chromium Controller. Reverse Transcription was performed within the  
483 droplets at 53  $^{\circ}$ C for 45 minutes. cDNA was amplified for a 12 cycles total on a Biometra  
484 thermocycler. cDNA size selection was performed using SpriSelect beads (Beckman Coulter,  
485 USA) and a ratio of SpriSelect reagent volume to sample volume of 0.6. cDNA was analyzed  
486 on an Agilent Bioanalyzer High Sensitivity DNA chip for qualitative control purposes. cDNA  
487 was fragmented using the proprietary fragmentation enzyme blend for 5 minutes at 32  $^{\circ}$ C,  
488 followed by end repair and A-tailing at 65  $^{\circ}$ C for 30 minutes. cDNA was double-sided size  
489 selected using SpriSelect beads. Sequencing adaptors were ligated to the cDNA at 20  $^{\circ}$ C for

490 15 minutes. cDNA was amplified using a sample-specific index oligo as a primer, followed by  
491 another round of double-sided size selection using SpriSelect beads. Final libraries were  
492 analyzed on an Agilent Bioanalyzer High Sensitivity DNA chip for quality control. cDNA  
493 libraries were sequenced on a NextSeq500 Illumina platform aiming for 50,000 reads per cell.  
494 Base calls were converted to reads with the software Cell Ranger (10x Genomics; version 3.1)

#### 495 **Quality control, processing, annotation, and differential gene expression analysis of** 496 **single-cell RNA-sequencing data**

497 We used the cellranger pipeline<sup>84</sup> to generate gene expression count matrices from the raw  
498 data. For each sample, a gene-by-cell counts matrix was used to create a Seurat object using  
499 Seurat<sup>85,86</sup>. We filtered cell barcodes with < 500 UMIs and > 5 % mitochondrial contents. Each  
500 individual sample was then normalized by a factor of 10,000 and log transformed  
501 (NormalizeData). The top 2000 most variable genes were then identified within each sample  
502 using the FindVariableFeatures method. We then integrated the cells from all samples  
503 together using FindIntegrationAnchors and IntegrateData (2000 genes). The integrated gene  
504 expression matrix obtained by applying the filtering steps above was then used to perform  
505 principal component analysis (RunPCA), preliminary clustering analysis, including nearest  
506 neighbour graph (FindNeighbors) and unbiased clustering (FindClusters), and cell type  
507 annotation. Uniform Manifold Approximation and Projection (UMAP) was then used to  
508 visualise the integrated expression data. We identified gene expression markers for each  
509 cluster using FindAllMarkers from Seurat with default settings, including Wilcoxon test and  
510 Bonferroni p value correction<sup>85,86</sup>. Differential gene expression between specified clusters (or  
511 subclusters) was performed using FindMarkers (Wilcoxon rank sum test) with Benjamini-  
512 Hochberg false discovery rate (FDR) correction, average log fold change (logFC) and  
513 detection/expression percentage rate (pct). Genes were considered (significantly) differentially  
514 expressed if FDR < 0.05, logFC > 0.2 and pct > 20 % within the cells in a given group.

#### 515 **Gene relevance analysis of single-cell RNA sequencing data**

516 To determine gene relevance across the single cell RNA sequencing data, we used a network  
517 science approach. To study nodes relevance we applied Graph Theory rules<sup>87,88</sup> using  
518 mathematical and social network analysis concepts. We restricted the analysis to protein-  
519 protein interactions and to the pathways in which the gene *il1a* is involved. Relevant pathways  
520 (Cytokine-cytokine receptor interaction, Necroptosis, Hematopoietic cell lineage, Type I  
521 diabetes mellitus, Pertussis, Leishmaniasis, Tuberculosis and Inflammatory bowel disease)  
522 and related were selected using the Kyoto Encyclopedia of Genes and Genomes<sup>89</sup>. Then we  
523 measured the expression of these genes in our scRNA-Seq dataset and we used their  
524 expression values as input of STRING<sup>90</sup>. The resulting graph was used for the network  
525 analysis. We implemented a previously described comprehensive algorithm for evaluating



526 node influences in social networks<sup>91</sup>. This algorithm is based on three centrality measures:  
527 eigenvector centrality<sup>92</sup>, current flow betweenness centrality<sup>93,94</sup> and reachability<sup>95</sup>.  
528 Eigenvector centrality computes the centrality for a node based on the centrality of its  
529 neighbors. Current-flow betweenness centrality starts from an electrical current model  
530 describing the spreading pattern, to which betweenness centrality, which uses shortest paths,  
531 is applied. Finally, reachability refers to the local reaching centrality of a node in a directed  
532 graph as the proportion of other nodes reachable from that node. In addition single cell CMP  
533 values are taken as weights of the nodes. Basing on these parameters, the algorithm ranked  
534 node influences by analyzing preference relations and performing random walk. In the first  
535 step a partial preference graph (PPG) is derived from the analysis of preference relation  
536 between every node pair for each measure. Later, the comprehensive preference graph (CPG)  
537 originated from the combination of preference relations and the three previously indicated  
538 measures. Finally, a random walk was executed on CPG to determine node effect. By applying  
539 this implementation to scSeq data, it was possible to obtain a list of genes related to *il1a*  
540 pathways, according to their importance in our dataset.

#### 541 **Proliferation (MTT)**

542 To evaluate tumor cells proliferation and response to treatments, B16-F1 and A375 cells were  
543 seeded in a 96-well plate. Carrier-free recombinant mouse (Biolegend) or human  
544 (SinoBiological) IL-1 $\alpha$  were administered at 10 ng/mL and cells were incubated, respectively,  
545 for 24 hours or 72 hours. Anti-mouse IL-1 $\alpha$  monoclonal antibody (InVivoMAb anti-mouse IL-  
546 1 $\alpha$ , clone ALF-161, BioXCell) was administered at the indicated doses 24 hours before data  
547 collection. To inhibit STAT3, stattic (SelleckChem) was administered at the indicated dosages.  
548 Proliferation was assessed by MTT (Methylthiazolyldiphenyl-tetrazolium bromide) assay  
549 according to the manufacturer's recommendations (Sigma). Absorbance (OD, 560 nm) was  
550 measured in a microplate reader (Cytation 5, BioTek). Sensitivity to single drug treatments  
551 was evaluated by IC50 (4-parameters calculation upon log-scaled doses), as previously  
552 reported<sup>96</sup>. The beneficial effect of the combinations versus the single agents was considered  
553 both as synergism according to the Chou-Talalay combination index<sup>97</sup>, as previously  
554 performed<sup>96,98</sup>, and as potency and efficacy according to the MuSyC algorithm<sup>99</sup>.

#### 555 **qPCR**

556 To measure the expression of *STAT3*, *Myd88* and *Gapdh* genes, the following sets of primers  
557 were designed: *STAT3* forward, 5'-CACAAATATTTTTGAGTCGGCGC-3'; *STAT3* reverse 5'-  
558 AAAGCCCCCGATGAGGTAATTC-3'; *Myd88* forward, 5'-CGGCAACTAGAACAGACAGACT-  
559 3'; *Myd88* reverse, 5'-GCAAACCTGGTCTGGAAGTCAC-3'; *Gapdh* forward, 5'-  
560 ACATCATCCCTGCATCCACT-3' ; *Gapdh* reverse, 5'-AGATCCACGACGGACACATT-3'. To  
561 isolate RNA from cell culture, cells were disposed of in single-cell suspension in calcium- and

562 magnesium-free PBS (PBS<sup>-</sup>). RNA was isolated using an RNAeasy Mini kit (QIAGEN). Two  
563 µg of cDNA were synthesized using a cDNA synthesis kit (Applied Biosystems) following the  
564 manufacturer's recommendations. For the qPCR reaction, a SYBR Master Mix (Applied  
565 Biosystems) was used, and samples were run on a QuantStudio™ 3 Real-Time PCR System  
566 (ThermoFisher). mRNA levels were expressed relative to GAPDH expression. The Pfaffl  
567 method<sup>100</sup> was used to calculate the relative expression of the transcripts.

### 568 **Immunoblotting**

569 To evaluate protein expression in tumor cells, B16-F1 and A375 cells were treated using  
570 carrier-free recombinant mouse (Biolegend) or human (SinoBiological) IL-1α, at 100 ng/mL.  
571 To block IL-1α, anti-mouse IL-1α monoclonal antibody (InVivoMAb anti-mouse IL-1α, clone  
572 ALF-161, BioXCell) was administered at the dose of 100 ng/mL. All treatments were  
573 administered either for 24 hours or 72 hours. Cells were harvested and lysed by boiling  
574 samples in 2x Laemmli sample buffer (BioRad), supplemented with β-mercaptoethanol  
575 (Merck), for 10 minutes. Lysates (30-50 µg) were resolved according to molecular weight by  
576 electrophoresis using Mini-PROTEAN TGX Precast gels 4-20 % gradient (BioRad). Next,  
577 proteins were blotted onto nitrocellulose membrane (BioRad) by electric transfer and the  
578 membranes were blocked in TBST (20 mM Tris-HCl [pH 7.5], 150 mM NaCl, 0.1 % Tween 20)  
579 with 5 % nonfat dry milk (BioRad) for one hour at room temperature. The following primary  
580 antibodies were used in TBST 5 % BSA buffer: mouse monoclonal, anti-Stat3 (clone 124H6,  
581 9139, Cell Signaling Technology) and rabbit monoclonal, anti-p(Y705)Stat3 (9131, Cell  
582 Signaling Technology). Mouse monoclonal anti-GAPDH (clone FF26A/F9, CNIO) was used in  
583 TBST with 5 % nonfat dry milk. The secondary antibodies used were: ECL anti-mouse IgG  
584 horseradish peroxidase-linked species-specific whole antibody and ECL anti-rabbit IgG  
585 horseradish peroxidase-linked species-specific whole antibody (GE Healthcare). Membranes  
586 were treated with Westar ηC 2.0 chemiluminescent substrate (Cyanagen) and signals were  
587 detected using digital imaging with Fusion Solo (Vilber Lourmat).

### 588 **Statistical analyses**

589 All raw data were analyzed, processed and presented using GraphPad Prism 8.2.1 (Graphpad  
590 Software, La Jolla, USA). First, we applied the Shapiro-Wilk normality test to analyze the  
591 distribution of data. Then we compared means among groups using One-Way ANOVA or  
592 Unpaired t test for data with normal distribution, and the non-parametric Kruskal-Wallis or  
593 Mann-Whitney test for groups which did not present a normal distribution. In all statistical tests  
594 P value is indicated as \* when <0.05, \*\* when <0.005, \*\*\* when <0.0005, \*\*\*\* when < 0.0001.

595 **ACKNOWLEDGMENTS**

596 We thank Federica Sallusto (IRB, Bellinzona, Switzerland), Carlo Catapano (IOR, Bellinzona,  
597 Switzerland) and Greta Guarda (IRB, Bellinzona, Switzerland) for providing, respectively, IL-  
598 1R1 KO mice, A375, B16-F1 and B16-F10 cell lines. We also thank David Jarossay (IRB,  
599 Bellinzona, Switzerland) for assistance in flow cytometry and live cell sorting experiments,  
600 Diego Ulisse Pizzagalli (IRB, Bellinzona, Switzerland) for the support in Imaris Software  
601 usage, Kevin Ceni (IRB, Bellinzona, Switzerland) for Supp. Mov. 1 editing, and Rocco  
602 D'Antuono (IRB, Bellinzona, Switzerland, now Francis Crick Institute, London, United  
603 Kingdom) for microscopy support.

604 **REFERENCES**

605

- 606 1. Carr S, Smith C, Wernberg J. Epidemiology and Risk Factors of Melanoma. *Surg Clin*  
607 *North Am.* 2020;100(1):1-12. doi:10.1016/j.suc.2019.09.005
- 608 2. Karlsson MC, Gonzalez SF, Welin J, Fuxe J. Epithelial-mesenchymal transition in  
609 cancer metastasis through the lymphatic system. *Mol Oncol.* 2017;11(7):781-791.  
610 doi:10.1002/1878-0261.12092
- 611 3. Damsky WE, Rosenbaum LE, Bosenberg M. Decoding melanoma metastasis.  
612 *Cancers (Basel).* 2011;3(1):126-163. doi:10.3390/cancers3010126
- 613 4. Ulmer A, Dietz K, Hodak I, et al. Quantitative Measurement of Melanoma Spread in  
614 Sentinel Lymph Nodes and Survival. *PLoS Med.* 2014;11(2):e1001604.  
615 doi:10.1371/journal.pmed.1001604
- 616 5. JE G, RA S, KR H, et al. Melanoma staging: Evidence-based changes in the  
617 American Joint Committee on Cancer eighth edition cancer staging manual. *CA*  
618 *Cancer J Clin.* 2017;67(6):472-492. doi:10.3322/CAAC.21409
- 619 6. Wiley HE, Gonzalez EB, Maki W, Wu MT, Hwang ST. Expression of CC chemokine  
620 receptor-7 and regional lymph node metastasis of B16 murine melanoma. *J Natl*  
621 *Cancer Inst.* 2001;93(21):1638-1643. doi:10.1093/jnci/93.21.1638
- 622 7. A B-B. Organ selectivity in metastasis: regulation by chemokines and their receptors.  
623 *Clin Exp Metastasis.* 2008;25(4):345-356. doi:10.1007/S10585-007-9097-3
- 624 8. Das S, Sarrou E, Podgrabinska S, et al. Tumor cell entry into the lymph node is  
625 controlled by CCL1 chemokine expressed by lymph node lymphatic sinuses. *J Exp*  
626 *Med.* 2013;210(8):1509-1528. doi:10.1084/jem.20111627
- 627 9. Singh R, Choi BK. Siglec1-expressing subcapsular sinus macrophages provide soil  
628 for melanoma lymph node metastasis. *Elife.* 2019;8. doi:10.7554/eLife.48916
- 629 10. Kretschmer L, Mitteldorf C, Hellriegel S, et al. The sentinel node invasion level (SNIL)  
630 as a prognostic parameter in melanoma. *Mod Pathol 2021.* Published online June 15,  
631 2021:1-11. doi:10.1038/s41379-021-00835-5
- 632 11. Brown M, Assen FP, Leithner A, et al. Lymph node blood vessels provide exit routes  
633 for metastatic tumor cell dissemination in mice. *Science (80- ).* 2018;359(6382):1408-  
634 1411. doi:10.1126/science.aal3662
- 635 12. Pereira ER, Kedrin D, Seano G, et al. Lymph node metastases can invade local blood  
636 vessels, exit the node, and colonize distant organs in mice. *Science (80- ).*  
637 2018;359(6382):1403-1407. doi:10.1126/science.aal3622

- 638 13. Ubellacker JM, Tasdogan A, Ramesh V, et al. Lymph protects metastasizing  
639 melanoma cells from ferroptosis. *Nature*. 2020;585(7823):113-118.  
640 doi:10.1038/s41586-020-2623-z
- 641 14. Gray EE, Cyster JG. Lymph node macrophages. *J Innate Immun*. 2012;4(5-6):424-  
642 436. doi:10.1159/000337007
- 643 15. Kuka M, Iannacone M. The role of lymph node sinus macrophages in host defense.  
644 *Ann N Y Acad Sci*. 2014;1319(1):38-46. doi:10.1111/NYAS.12387
- 645 16. YR C, FD B. B cells acquire particulate antigen in a macrophage-rich area at the  
646 boundary between the follicle and the subcapsular sinus of the lymph node. *Immunity*.  
647 2007;27(1):160-171. doi:10.1016/J.IMMUNI.2007.06.007
- 648 17. M I, EA M, E T, et al. Subcapsular sinus macrophages prevent CNS invasion on  
649 peripheral infection with a neurotropic virus. *Nature*. 2010;465(7301):1079-1083.  
650 doi:10.1038/NATURE09118
- 651 18. SF G, V L-K, MP K, et al. Capture of influenza by medullary dendritic cells via SIGN-  
652 R1 is essential for humoral immunity in draining lymph nodes. *Nat Immunol*.  
653 2010;11(5):427-434. doi:10.1038/NI.1856
- 654 19. M G, A C, B M, et al. Host response. Inflammation-induced disruption of SCS  
655 macrophages impairs B cell responses to secondary infection. *Science*.  
656 2015;347(6222):667-672. doi:10.1126/SCIENCE.AAA1300
- 657 20. Chatziandreou N, Farsakoglu Y, Palomino-Segura M, et al. Macrophage Death  
658 following Influenza Vaccination Initiates the Inflammatory Response that Promotes  
659 Dendritic Cell Function in the Draining Lymph Node. *Cell Rep*. 2017;18(10):2427-  
660 2440. doi:10.1016/j.celrep.2017.02.026
- 661 21. Asano K, Nabeyama A, Miyake Y, et al. CD169-Positive Macrophages Dominate  
662 Antitumor Immunity by Crosspresenting Dead Cell-Associated Antigens. *Immunity*.  
663 2011;34(1):85-95. doi:10.1016/j.immuni.2010.12.011
- 664 22. Kumamoto K, Tasaki T, Ohnishi K, et al. CD169 Expression on Lymph Node  
665 Macrophages Predicts in Patients With Gastric Cancer. *Front Oncol*. 2021;11:824.  
666 doi:10.3389/FONC.2021.636751
- 667 23. Moalli F, Proulx ST, Schwendener R, Detmar M, Schlapbach C, Stein J V. Intravital  
668 and whole-organ imaging reveals capture of melanoma-derived antigen by lymph  
669 node subcapsular macrophages leading to widespread deposition on follicular  
670 dendritic cells. *Front Immunol*. 2015;6(MAR). doi:10.3389/fimmu.2015.00114
- 671 24. Pucci F, Garris C, Lai CP, et al. SCS macrophages suppress melanoma by restricting  
672 tumor-derived vesicle-B cell interactions. Published online 2016.

- 673 doi:10.1126/science.aaf1328
- 674 25. Louie DAP, Liao S. Lymph Node Subcapsular Sinus Macrophages as the Frontline of  
675 Lymphatic Immune Defense. *Front Immunol.* 2019;10(FEB):347.  
676 doi:10.3389/FIMMU.2019.00347
- 677 26. Björk Gunnarsdottir F, Auoja N, Bendahl P-O, Rydén L, Fernö M, Leandersson K. Co-  
678 localization of CD169+ macrophages and cancer cells in lymph node metastases of  
679 breast cancer patients is linked to improved prognosis and PDL1 expression.  
680 *Oncoimmunology.* 2020;9(1):1848067. doi:10.1080/2162402X.2020.1848067
- 681 27. Tacconi C, Commerford CD, Dieterich LC, et al. CD169+ lymph node macrophages  
682 have protective functions in mouse breast cancer metastasis. *Cell Rep.*  
683 2021;35(2):108993. doi:10.1016/j.celrep.2021.108993
- 684 28. Balkwill F, Charles KA, Mantovani A. Smoldering and polarized inflammation in the  
685 initiation and promotion of malignant disease. *Cancer Cell.* 2005;7(3):211-217.  
686 doi:10.1016/j.ccr.2005.02.013
- 687 29. Mantovani A, Allavena P, Sica A, Balkwill F. Cancer-related inflammation. *Nature.*  
688 2008;454(7203):436-444. doi:10.1038/nature07205
- 689 30. Cassetta L, Fragkogianni S, Sims AH, Coussens LM, Smith HO, Pollard  
690 Correspondence JW. Human Tumor-Associated Macrophage and Monocyte  
691 Transcriptional Landscapes Reveal Cancer-Specific Reprogramming, Biomarkers,  
692 and Therapeutic Targets. Published online 2019. doi:10.1016/j.ccell.2019.02.009
- 693 31. Birmingham KG, O'Melia MJ, Bordy S, et al. Lymph Node Subcapsular Sinus  
694 Microenvironment-On-A-Chip Modeling Shear Flow Relevant to Lymphatic Metastasis  
695 and Immune Cell Homing. *iScience.* 2020;23(11):101751.  
696 doi:10.1016/J.ISCI.2020.101751
- 697 32. Balkwill F, Mantovani A. Inflammation and cancer: Back to Virchow? *Lancet.*  
698 2001;357(9255):539-545. doi:10.1016/S0140-6736(00)04046-0
- 699 33. Spranger S, Luke JJ, Bao R, et al. Density of immunogenic antigens does not explain  
700 the presence or absence of the T-cell-inflamed tumor microenvironment in melanoma.  
701 *Proc Natl Acad Sci U S A.* 2016;113(48):E7759-E7768.  
702 doi:10.1073/pnas.1609376113
- 703 34. Trujillo JA, Sweis RF, Bao R, Luke JJ. T cell-inflamed versus Non-T cell-inflamed  
704 tumors: a conceptual framework for cancer immunotherapy drug development and  
705 combination therapy selection. *Cancer Immunol Res.* 2018;6(9):990-1000.  
706 doi:10.1158/2326-6066.CIR-18-0277
- 707 35. Ochoa de Olza M, Navarro Rodrigo B, Zimmermann S, Coukos G. Turning up the

- 708 heat on non-immunoreactive tumours: opportunities for clinical development. *Lancet*  
709 *Oncol.* 2020;21(9):e419-e430. doi:10.1016/S1470-2045(20)30234-5
- 710 36. Voronov E, Dotan S, Krelin Y, et al. Unique versus redundant functions of IL-1 $\alpha$  and  
711 IL-1 $\beta$  in the tumor microenvironment. *Front Immunol.* 2013;4(JUL):177.  
712 doi:10.3389/fimmu.2013.00177
- 713 37. RN A, S D, M E, et al. The involvement of IL-1 in tumorigenesis, tumor invasiveness,  
714 metastasis and tumor-host interactions. *Cancer Metastasis Rev.* 2006;25(3):387-408.  
715 doi:10.1007/S10555-006-9004-4
- 716 38. Kaplanov I, Carmi Y, Kornetsky R, et al. Blocking IL-1 $\beta$  reverses the  
717 immunosuppression in mouse breast cancer and synergizes with anti-PD-1 for tumor  
718 abrogation. *Proc Natl Acad Sci U S A.* 2019;116(4):1361-1369.  
719 doi:10.1073/pnas.1812266115
- 720 39. Mantovani A, Dinarello CA, Molgora M, Garlanda C. Interleukin-1 and Related  
721 Cytokines in the Regulation of Inflammation and Immunity. *Immunity.* 2019;50(4):778-  
722 795. doi:10.1016/j.immuni.2019.03.012
- 723 40. Lust JA, Lacy MQ, Zeldenrust SR, et al. Induction of a chronic disease state in  
724 patients with smoldering or indolent multiple myeloma by targeting interleukin 1 $\beta$ -  
725 induced interleukin 6 production and the myeloma proliferative component. *Mayo Clin*  
726 *Proc.* 2009;84(2):114-122. doi:10.4065/84.2.114
- 727 41. Hong DS, Hui D, Bruera E, et al. MABp1, a first-in-class true human antibody  
728 targeting interleukin-1 $\alpha$  in refractory cancers: An open-label, phase 1 dose-escalation  
729 and expansion study. *Lancet Oncol.* 2014;15(6):656-666. doi:10.1016/S1470-  
730 2045(14)70155-X
- 731 42. Hong DS, Janku F, Naing A, et al. Xilonix, a novel true human antibody targeting the  
732 inflammatory cytokine interleukin-1 alpha, in non-small cell lung cancer. *Invest New*  
733 *Drugs.* 2015;33(3):621-631. doi:10.1007/s10637-015-0226-6
- 734 43. Lust JA, Lacy MQ, Zeldenrust SR, et al. Reduction in C-reactive protein indicates  
735 successful targeting of the IL-1/IL-6 axis resulting in improved survival in early stage  
736 multiple myeloma. *Am J Hematol.* 2016;91(6):571-574. doi:10.1002/ajh.24352
- 737 44. Hickish T, Andre T, Wyrwicz L, et al. MABp1 as a novel antibody treatment for  
738 advanced colorectal cancer: a randomised, double-blind, placebo-controlled, phase 3  
739 study. *Lancet Oncol.* 2017;18(2):192-201. doi:10.1016/S1470-2045(17)30006-2
- 740 45. Janssen LME, Ramsay EE, Logsdon CD, Overwijk WW. The immune system in  
741 cancer metastasis: Friend or foe? *J Immunother Cancer.* 2017;5(1):79.  
742 doi:10.1186/s40425-017-0283-9

- 743 46. Garner H, de Visser KE. Immune crosstalk in cancer progression and metastatic  
744 spread: a complex conversation. *Nat Rev Immunol*. 2020;20(8):483-497.  
745 doi:10.1038/s41577-019-0271-z
- 746 47. Hiam-Galvez KJ, Allen BM, Spitzer MH. Systemic immunity in cancer. *Nat Rev*  
747 *Cancer*. Published online April 9, 2021:1-15. doi:10.1038/s41568-021-00347-z
- 748 48. Edwards SC, Hoevenaar WHM, Coffelt SB. Emerging immunotherapies for  
749 metastasis. *Br J Cancer*. 2021;124(1):37-48. doi:10.1038/s41416-020-01160-5
- 750 49. Ralli M, Botticelli A, Visconti IC, et al. Immunotherapy in the Treatment of Metastatic  
751 Melanoma: Current Knowledge and Future Directions. *J Immunol Res*. 2020;2020.  
752 doi:10.1155/2020/9235638
- 753 50. Michielin O, Atkins MB, Koon HB, Dummer R, Ascierto PA. Evolving impact of long-  
754 Term survival results on metastatic melanoma treatment. *J Immunother Cancer*.  
755 2020;8(2):948. doi:10.1136/jitc-2020-000948
- 756 51. Lee C kun, Jeong S hwan, Jang C, et al. Tumor metastasis to lymph nodes requires  
757 YAP-dependent metabolic adaptation. *Science (80- )*. 2019;363(6427):644-649.  
758 doi:10.1126/science.aav0173
- 759 52. Pizzagalli DU, Latino I, Pulfer A, et al. Characterization of the Dynamic Behavior of  
760 Neutrophils Following Influenza Vaccination. *Front Immunol*. 2019;10.  
761 doi:10.3389/fimmu.2019.02621
- 762 53. Fu X-Q, Liu B, Wang Y-P, et al. Activation of STAT3 is a key event in TLR4 signaling-  
763 mediated melanoma progression. *Cell Death Dis 2020 114*. 2020;11(4):1-15.  
764 doi:10.1038/s41419-020-2440-1
- 765 54. A S, R S, O E, et al. STAT3 promotes melanoma metastasis by CEBP-induced  
766 repression of the MITF pathway. *Oncogene*. 2021;40(6):1091-1105.  
767 doi:10.1038/S41388-020-01584-6
- 768 55. Malvey J, Puig S. Expression of Stat3 and Src proteins in mucosal, cutaneous, and  
769 metastatic melanoma. *J Am Acad Dermatol*. 2005;52(3):P144.  
770 doi:10.1016/J.JAAD.2004.10.584
- 771 56. Lin W-H, Chang Y-W, Hong M-X, et al. STAT3 phosphorylation at Ser727 and Tyr705  
772 differentially regulates the EMT–MET switch and cancer metastasis. *Oncogene 2020*  
773 *404*. 2020;40(4):791-805. doi:10.1038/s41388-020-01566-8
- 774 57. Zerdes I, Wallerius M, Sifakis EG, et al. STAT3 Activity Promotes Programmed-Death  
775 Ligand 1 Expression and Suppresses Immune Responses in Breast Cancer. *Cancers*  
776 *(Basel)*. 2019;11(10). doi:10.3390/CANCERS11101479
- 777 58. Zou S, Tong Q, Liu B, Huang W, Tian Y, Fu X. Targeting STAT3 in Cancer



- 778 Immunotherapy. *Mol Cancer* 2020 191. 2020;19(1):1-19. doi:10.1186/S12943-020-  
779 01258-7
- 780 59. Hoeller C. The future of combination therapies in advanced melanoma. *memo - Mag*  
781 *Eur Med Oncol* 2020 133. 2020;13(3):309-313. doi:10.1007/S12254-020-00640-X
- 782 60. Yu C, Liu X, Yang J, et al. Combination of Immunotherapy With Targeted Therapy:  
783 Theory and Practice in Metastatic Melanoma. *Front Immunol*. 2019;0(MAY):990.  
784 doi:10.3389/FIMMU.2019.00990
- 785 61. Berraondo P, Sanmamed MF, Ochoa MC, et al. Cytokines in clinical cancer  
786 immunotherapy. *Br J Cancer* 2018 1201. 2018;120(1):6-15. doi:10.1038/s41416-018-  
787 0328-y
- 788 62. Johnson DE, O'Keefe RA, Grandis JR. Targeting the IL-6/JAK/STAT3 signalling axis  
789 in cancer. *Nat Rev Clin Oncol* 2018 154. 2018;15(4):234-248.  
790 doi:10.1038/nrclinonc.2018.8
- 791 63. Lippitz BE, Harris RA. Cytokine patterns in cancer patients: A review of the correlation  
792 between interleukin 6 and prognosis. *Oncoimmunology*. 2016;5(5).  
793 doi:10.1080/2162402X.2015.1093722
- 794 64. Kurzrock R, Hickish T, Wyrwicz L, et al. Interleukin-1 receptor antagonist levels  
795 predict favorable outcome after bermekimab, a first-in-class true human interleukin-1 $\alpha$   
796 antibody, in a phase III randomized study of advanced colorectal cancer.  
797 *Oncoimmunology*. 2019;8(3). doi:10.1080/2162402X.2018.1551651
- 798 65. Kauffmann-Guerrero D, Kahnert K, Kiefl R, et al. Systemic inflammation and pro-  
799 inflammatory cytokine profile predict response to checkpoint inhibitor treatment in  
800 NSCLC: a prospective study. *Sci Reports* 2021 111. 2021;11(1):1-10.  
801 doi:10.1038/s41598-021-90397-y
- 802 66. Wang M, Zhai X, Li J, et al. The Role of Cytokines in Predicting the Response and  
803 Adverse Events Related to Immune Checkpoint Inhibitors. *Front Immunol*.  
804 2021;0:2894. doi:10.3389/FIMMU.2021.670391
- 805 67. Perrichet A, Ghiringhelli F, Rébé C. Understanding Inflammasomes and PD-1/PD-L1  
806 Crosstalk to Improve Cancer Treatment Efficiency. *Cancers (Basel)*. 2020;12(12):1-  
807 19. doi:10.3390/CANCERS12123550
- 808 68. Ashizawa T, Iizuka A, Maeda C, et al. Impact of combination therapy with anti-PD-1  
809 blockade and a STAT3 inhibitor on the tumor-infiltrating lymphocyte status. *Immunol*  
810 *Lett*. 2019;216:43-50. doi:10.1016/J.IMLET.2019.10.003
- 811 69. MW M, RC M, M Q, et al. Immune response in melanoma: an in-depth analysis of the  
812 primary tumor and corresponding sentinel lymph node. *Mod Pathol*. 2012;25(7):1000-

- 813 1010. doi:10.1038/MODPATHOL.2012.43
- 814 70. Chitty JL, Filipe EC, Lucas MC, Herrmann D, Cox TR, Timpson P. Recent advances  
815 in understanding the complexities of metastasis. *F1000Research*. 2018;7.  
816 doi:10.12688/F1000RESEARCH.15064.2
- 817 71. Zhou H, Lei P, Padera TP. Progression of Metastasis through Lymphatic System.  
818 *Cells 2021, Vol 10, Page 627*. 2021;10(3):627. doi:10.3390/CELLS10030627
- 819 72. Hu J, Xu J, Li M, et al. Targeting Lymph Node Sinus Macrophages to Inhibit Lymph  
820 Node Metastasis. *Mol Ther Nucleic Acid*. 2019;16:650-662.  
821 doi:10.1016/j.omtn.2019.04.016
- 822 73. Mantovani A, Marchesi F, Jaillon S, Garlanda C, Allavena P. Tumor-associated  
823 myeloid cells: diversity and therapeutic targeting. *Cell Mol Immunol*. 2021;18(3):566-  
824 578. doi:10.1038/s41423-020-00613-4
- 825 74. Tacconi C, Commerford CD, Dieterich LC, et al. CD169+ lymph node macrophages  
826 have protective functions in mouse breast cancer metastasis. *Cell Rep*.  
827 2021;35(2):108993. doi:10.1016/j.celrep.2021.108993
- 828 75. Cassetta L, Pollard JW. Repolarizing macrophages improves breast cancer therapy.  
829 *Cell Res 2017 278*. 2017;27(8):963-964. doi:10.1038/cr.2017.63
- 830 76. Crecente-Campo J, Virgilio T, Morone D, et al. Design of polymeric nanocapsules to  
831 improve their lympho-targeting capacity. *Nanomedicine*. 2019;14(23).  
832 doi:10.2217/nnm-2019-0206
- 833 77. Schudel A, Francis DM, Thomas SN. Material design for lymph node drug delivery.  
834 *Nat Rev Mater*. 2019;4(6):415. doi:10.1038/S41578-019-0110-7
- 835 78. Grabowska J, Lopez-Venegas MA, Affandi AJ, den Haan JMM. CD169+  
836 Macrophages Capture and Dendritic Cells Instruct: The Interplay of the Gatekeeper  
837 and the General of the Immune System. *Front Immunol*. 2018;9(OCT):2472.  
838 doi:10.3389/FIMMU.2018.02472
- 839 79. Rider P, Kaplanov I, Romzova M, et al. The transcription of the alarmin cytokine  
840 interleukin-1 alpha is controlled by hypoxia inducible factors 1 and 2 alpha in hypoxic  
841 cells. *Front Immunol*. 2012;3(SEP). doi:10.3389/FIMMU.2012.00290
- 842 80. Kurzrock R, Hickish T, Wyrwicz L, et al. Interleukin-1 receptor antagonist levels  
843 predict favorable outcome after bermekimab, a first-in-class true human interleukin-1 $\alpha$   
844 antibody, in a phase III randomized study of advanced colorectal cancer.  
845 *Oncoimmunology*. 2019;8(3). doi:10.1080/2162402X.2018.1551651
- 846 81. Horai R, Asano M, Sudo K, et al. Production of mice deficient in genes for interleukin  
847 (IL)-1 $\alpha$ , IL-1 $\beta$ , IL-1 $\alpha/\beta$ , and IL-1 receptor antagonist shows that IL-1 $\beta$  is crucial in

- 848 turpentine-induced fever development and glucocorticoid secretion. *J Exp Med*.  
849 1998;187(9):1463-1475. doi:10.1084/jem.187.9.1463
- 850 82. Glaccum MB, Stocking KL, Charrier K, et al. Phenotypic and functional  
851 characterization of mice that lack the type I receptor for IL-1. *J Immunol*.  
852 1997;159(7):3364-3371. <http://www.ncbi.nlm.nih.gov/pubmed/9317135>
- 853 83. Jung S, Aliberti J, Graemmel P, et al. Analysis of Fractalkine Receptor CX3CR1  
854 Function by Targeted Deletion and Green Fluorescent Protein Reporter Gene  
855 Insertion. *Mol Cell Biol*. 2000;20(11):4106-4114. doi:10.1128/mcb.20.11.4106-  
856 4114.2000
- 857 84. Zheng GXY, Terry JM, Belgrader P, et al. Massively parallel digital transcriptional  
858 profiling of single cells. *Nat Commun*. 2017;8(1):1-12. doi:10.1038/ncomms14049
- 859 85. Butler A, Hoffman P, Smibert P, Papalexi E, Satija R. Integrating single-cell  
860 transcriptomic data across different conditions, technologies, and species. *Nat*  
861 *Biotechnol*. 2018;36(5):411-420. doi:10.1038/nbt.4096
- 862 86. Stuart T, Butler A, Hoffman P, et al. Comprehensive Integration of Single-Cell Data.  
863 *Cell*. 2019;177(7):1888-1902.e21. doi:10.1016/j.cell.2019.05.031
- 864 87. Catlin PA, Chartrand G. Introductory Graph Theory. *Am Math Mon*. 1987;94(5):483.  
865 doi:10.2307/2322751
- 866 88. Meyer B. *Self-Organizing Graphs-A Neural Network Perspective of Graph Layout*.
- 867 89. Kanehisa M, Furumichi M, Tanabe M, Sato Y, Morishima K. KEGG: New perspectives  
868 on genomes, pathways, diseases and drugs. *Nucleic Acids Res*. 2017;45(D1):D353-  
869 D361. doi:10.1093/nar/gkw1092
- 870 90. Szklarczyk D, Gable AL, Lyon D, et al. STRING v11: Protein-protein association  
871 networks with increased coverage, supporting functional discovery in genome-wide  
872 experimental datasets. *Nucleic Acids Res*. 2019;47(D1):D607-D613.  
873 doi:10.1093/nar/gky1131
- 874 91. Mao C, Xiao W. A comprehensive algorithm for evaluating node influences in social  
875 networks based on preference analysis and random walk. *Complexity*. 2018;2018.  
876 doi:10.1155/2018/1528341
- 877 92. Bihari A, Pandia MK. Eigenvector centrality and its application in research  
878 professionals' relationship network. In: *2015 1st International Conference on Futuristic*  
879 *Trends in Computational Analysis and Knowledge Management, ABLAZE 2015*.  
880 Institute of Electrical and Electronics Engineers Inc.; 2015:510-514.  
881 doi:10.1109/ABLAZE.2015.7154915
- 882 93. Brandes U, Fleischer D. Centrality measures based on current flow. In: *Lecture Notes*

- 883            *in Computer Science*. Vol 3404. Springer Verlag; 2005:533-544. doi:10.1007/978-3-  
884            540-31856-9\_44
- 885    94.    Newman MEJ. A measure of betweenness centrality based on random walks. *Soc*  
886            *Networks*. 2003;27(1):39-54. Accessed April 9, 2021. [http://arxiv.org/abs/cond-](http://arxiv.org/abs/cond-mat/0309045)  
887            [mat/0309045](http://arxiv.org/abs/cond-mat/0309045)
- 888    95.    Mones E. Hierarchy in directed random networks. *Phys Rev E - Stat Nonlinear, Soft*  
889            *Matter Phys*. 2013;87(2):022817. doi:10.1103/PhysRevE.87.022817
- 890    96.    C T, E G, AJ A, et al. PQR309 Is a Novel Dual PI3K/mTOR Inhibitor with Preclinical  
891            Antitumor Activity in Lymphomas as a Single Agent and in Combination Therapy. *Clin*  
892            *Cancer Res*. 2018;24(1):120-129. doi:10.1158/1078-0432.CCR-17-1041
- 893    97.    TC C. Drug combination studies and their synergy quantification using the Chou-  
894            Talalay method. *Cancer Res*. 2010;70(2):440-446. doi:10.1158/0008-5472.CAN-09-  
895            1947
- 896    98.    Gaudio E, Tarantelli C, Spriano F, et al. Targeting CD205 with the antibody drug  
897            conjugate MEN1309/OBT076 is an active new therapeutic strategy in lymphoma  
898            models. *Haematologica*. 2020;105(11):2584-2591.  
899            doi:10.3324/HAEMATOL.2019.227215
- 900    99.    Meyer CT, Wooten DJ, Paudel BB, et al. Quantifying Drug Combination Synergy  
901            along Potency and Efficacy Axes. *Cell Syst*. 2019;8(2):97-108.e16.  
902            doi:10.1016/J.CELS.2019.01.003
- 903    100.   Pfaffl MW. A new mathematical model for relative quantification in real-time RT-PCR.  
904            *Nucleic Acids Res*. 2001;29(9). doi:10.1093/nar/29.9.e45
- 905

906 **FIGURES LEGEND**

907

908 **Figure 1. Mouse melanoma metastases growth in the sentinel LN.** (A) FACS plot showing  
909 fluorescent expression of the mCherry transduced B16-F1 melanoma cells. (B) Schematic  
910 representation of the tumor model, including primary tumor engraftment (left) and migration of cells to  
911 the sLN (right). (C) Representative images and (D) quantification of IVIS time-course showing  
912 increasing primary tumor fluorescence (red). (E, left) Primary tumor (red arrow), draining sentinel LN  
913 (white circle) and (E, right) comparison between metastatic and healthy LN at week three p.t.i.. (F) Time-  
914 course of metastatic cell invasion of the sLN quantified by FACS. (G) Confocal micrograph of sLN at  
915 week one, two and three p.t.i., showing the position of B16 melanoma (red) with respect to CD21/35<sup>+</sup>  
916 (blue) follicular dendritic cells and CX3CR1<sup>+</sup> (green) myeloid cells. SS, IF, F, T and M stand for  
917 subcapsular sinus, inter-follicular, follicular, T cells and medullary areas, respectively. (H) Quantification  
918 of total metastatic area in the sLN, measured by confocal microscopy. (I) Quantification of tumor cells  
919 in the different compartments of the LN at week two and three p.t.i.. (J) Metastatic ratio, defined as the  
920 number of mice with metastases in the target organ divided by the total number of implanted mice, at  
921 week three p.t.i.. iLN stands for inguinal LN.

922

923 **Figure 2. Pro-tumoral release of IL-1 $\alpha$  in the metastatic LN**

924 (A) Progressive increase in the size of the sLN correlated with the increase in the total number of  
925 immune cells, measured by flow cytometry. (B) Quantification of inflammatory cytokines in the  
926 supernatant of metastatic (red) and non-metastatic (white) LN. (C) Time course kinetics showing IL-1 $\alpha$   
927 release in the sLN during the first three weeks p.t.i.. (D) Quantification of IL-1 $\alpha$  in the sLN at three weeks  
928 p.t.i. of different cancer models, including breast cancer (E0771) and the melanoma B16-F10. (E) Flow  
929 cytometric quantification of LN metastatic cells in animals treated with IL-1 $\alpha$  depleting antibody or  
930 recombinant IL-1 $\alpha$  in comparison to B16-F1 untreated group and PBS injected. (F) LN metastatic ratio  
931 in mice untreated or treated with anti-IL-1 $\alpha$  antibody or recombinant IL-1 $\alpha$  at week three p.t.i.. (G)  
932 Metastatic cells in the sLN of wild type and IL-1 $\alpha$  KO mice three weeks p.t.i..

933

934 **Figure 3. SSM are the main source of IL-1 $\alpha$ .** (A) UMAP plot of cell populations, identified by scSeq,  
935 in the metastasized sLN three weeks p.t.i.. (B) Percentage of cells expressing *il1a* and (C) average *il1a*  
936 expression in the cells of the sLN three weeks p.t.i., measured by scSeq. (D) IL-1 $\alpha$  quantification in  
937 metastasized sLN supernatant of mice depleted for macrophages by clodronate liposome (CLL)  
938 injection in comparison to untreated metastasized and non-metastasized LN. (E) Flow cytometric  
939 histograms showing presence, three weeks p.t.i., of IL-1 $\alpha$ <sup>+</sup> (red) and IL-1 $\alpha$  negative (gray) SSM. (F)  
940 Flow cytometric quantification of the number of IL-1 $\alpha$ <sup>+</sup> cells among the three major subtypes of  
941 macrophages in the sLN three weeks p.t.i. in comparison to negative controls. SSM, MCM and MM  
942 stand for Subcapsular Sinus Macrophages (CD169<sup>+</sup> F4/80<sup>-</sup>), Medullary Cord Macrophages (CD169<sup>-</sup>  
943 F4/80<sup>+</sup>) and Medullary Macrophages (CD169<sup>+</sup> F4/80<sup>+</sup>), respectively. (G) Confocal micrograph showing  
944 the whole sLN (left) and magnifications of the metastatic region (center and right) indicating IL-1 $\alpha$  and

945 tumor vesicles in CX3CR1<sup>+</sup> CD169<sup>+</sup> macrophages. Colors indicate CX3CR1<sup>+</sup> cells (green), mCherry<sup>+</sup>  
946 melanoma (red), CD169<sup>+</sup> macrophages (cyan) and IL-1 $\alpha$  (white). (H) Flow cytometric quantification  
947 indicating the number of each subtype of tumor<sup>+</sup> macrophages. (I) Confocal representative images of  
948 CD169<sup>+</sup> macrophages distribution in the sLN three weeks p.t.i. in comparison to negative controls. (J)  
949 Quantification of CD169 fluorescence in the main regions of the LN three weeks p.t.i., indicating  
950 disruption of CD169 layer (white arrows) in the SS overlying the metastatic area (SS<sup>MET</sup>).

951

952 **Figure 4. Direct effect of pro-tumoral IL-1 $\alpha$  on metastatic cells.** (A) Flow cytometry quantification of  
953 mean fluorescence intensity (MFI) indicating IL-1R1 expression in the sLN cell populations. (B) Flow  
954 cytometric quantification of metastatic cells and (C) metastatic ratio in wild type and IL-1R1 knock-out  
955 mice, three weeks p.t.i.. (D) Proliferation assay (MTT) of B16-F1 treated with recombinant IL-1 $\alpha$  for 24  
956 h in comparison to untreated cells. (E) Proliferation assay (MTT) of human melanoma A375 treated with  
957 human recombinant IL-1 $\alpha$  for 72 h, in comparison to untreated cells. (F) qPCR quantification of the  
958 Myd88 gene in B16-F1 stimulated with recombinant IL-1 $\alpha$  in comparison to unstimulated.

959

960 **Figure 5. IL-1 $\alpha$  induces STAT3 expression and phosphorylation in tumor.** (A) STRING graph  
961 representing the most influential genes obtained by node influence analysis of il1a enriched pathways  
962 in scSeq data of the metastatic area of the sLN. The influence of each node is expressed in a  
963 colorimetric scale. (B) Bar plot showing node influence of the ten most influential genes in il1a  
964 pathways three weeks p.t.i.. STAT3 is highlighted (red). (C) Bar plot indicating differential expression  
965 (DE) of the ten most influential nodes in tumor following IL-1 $\alpha$  block in comparison to untreated mice.  
966 STAT3 is highlighted (red). (D) Average STAT3 expression in each cell population of the metastatic  
967 sLN. (E) qPCR quantification of STAT3 expression in B16-F1 following recombinant IL-1 $\alpha$   
968 administration. Quantification of (F) STAT3 and (G) pSTAT3, measured by immunoblot, in B16-F1  
969 after IL-1 $\alpha$  treatment. Immunoblot quantifications of (H) STAT3 and (I) pSTAT3 in human melanoma  
970 A375 following exposure to IL-1 $\alpha$ . (J) Flow cytometric quantification of metastatic cells in mouse sLN  
971 of mice treated with anti-IL-1 $\alpha$  antibody, the STAT3 inhibitor stattic or their combination, in comparison  
972 to untreated. (K) Proliferation of mouse melanoma upon combination therapy with anti-IL-1 $\alpha$  stattic at  
973 different concentrations, measured by MTT assay.

**Figure 1. Mouse melanoma metastases grow in the sentinel LN**

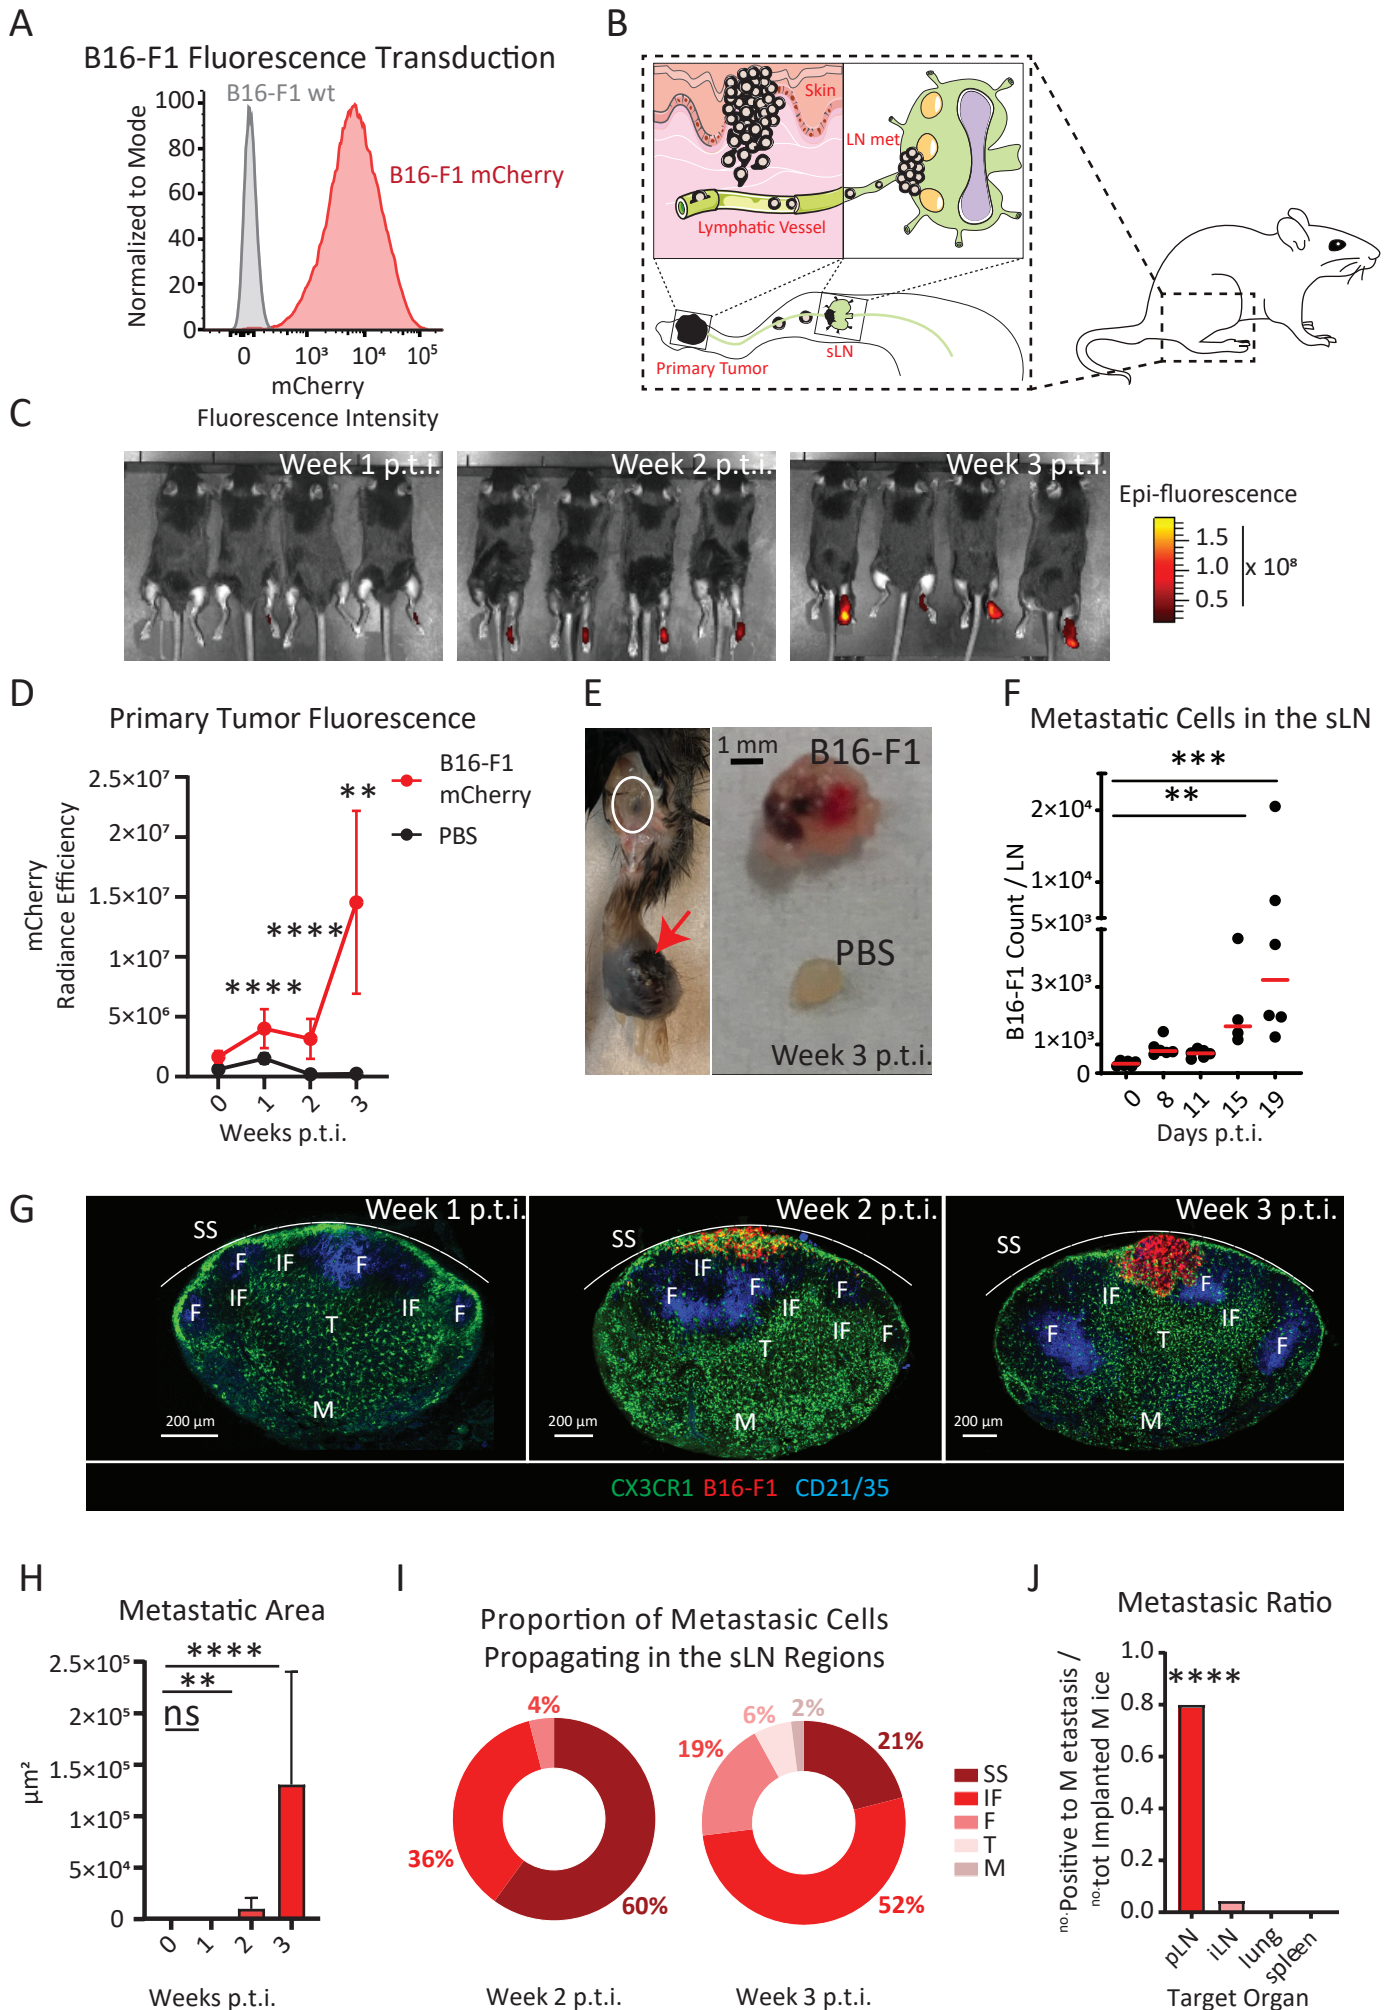

**Figure 2.** Pro-tumoral release of IL-1 $\alpha$  in the metastatic LN

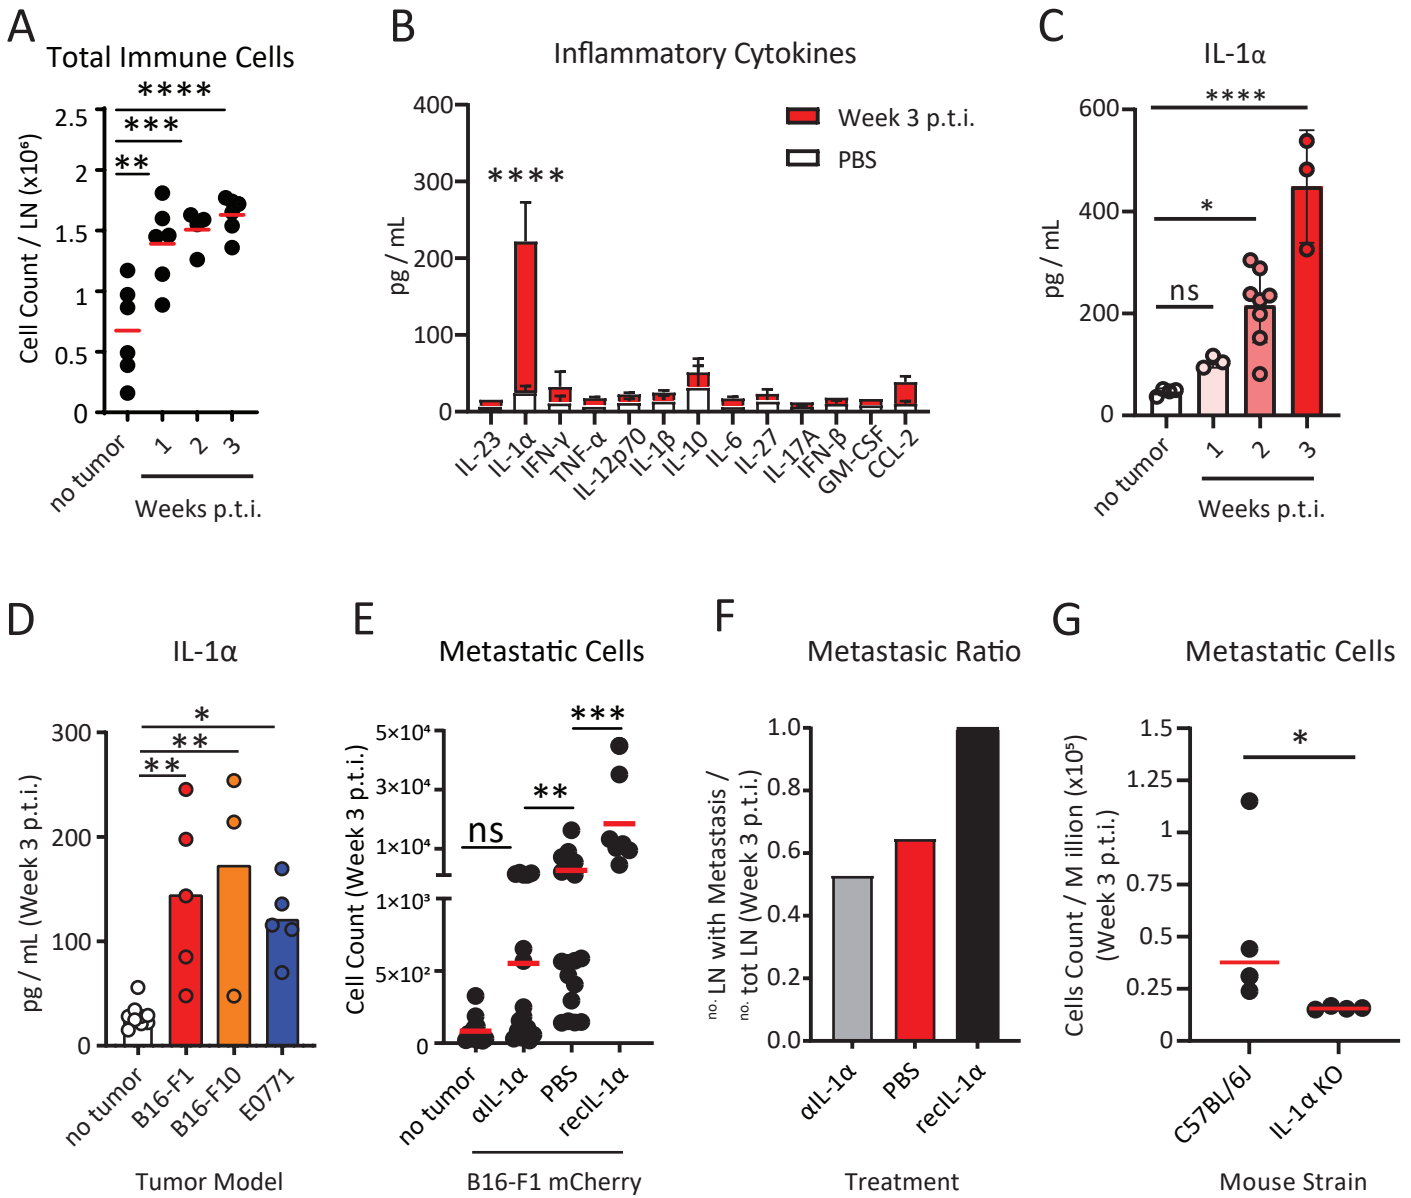



**Figure 3 SSMs are the main source of IL-1 $\alpha$**

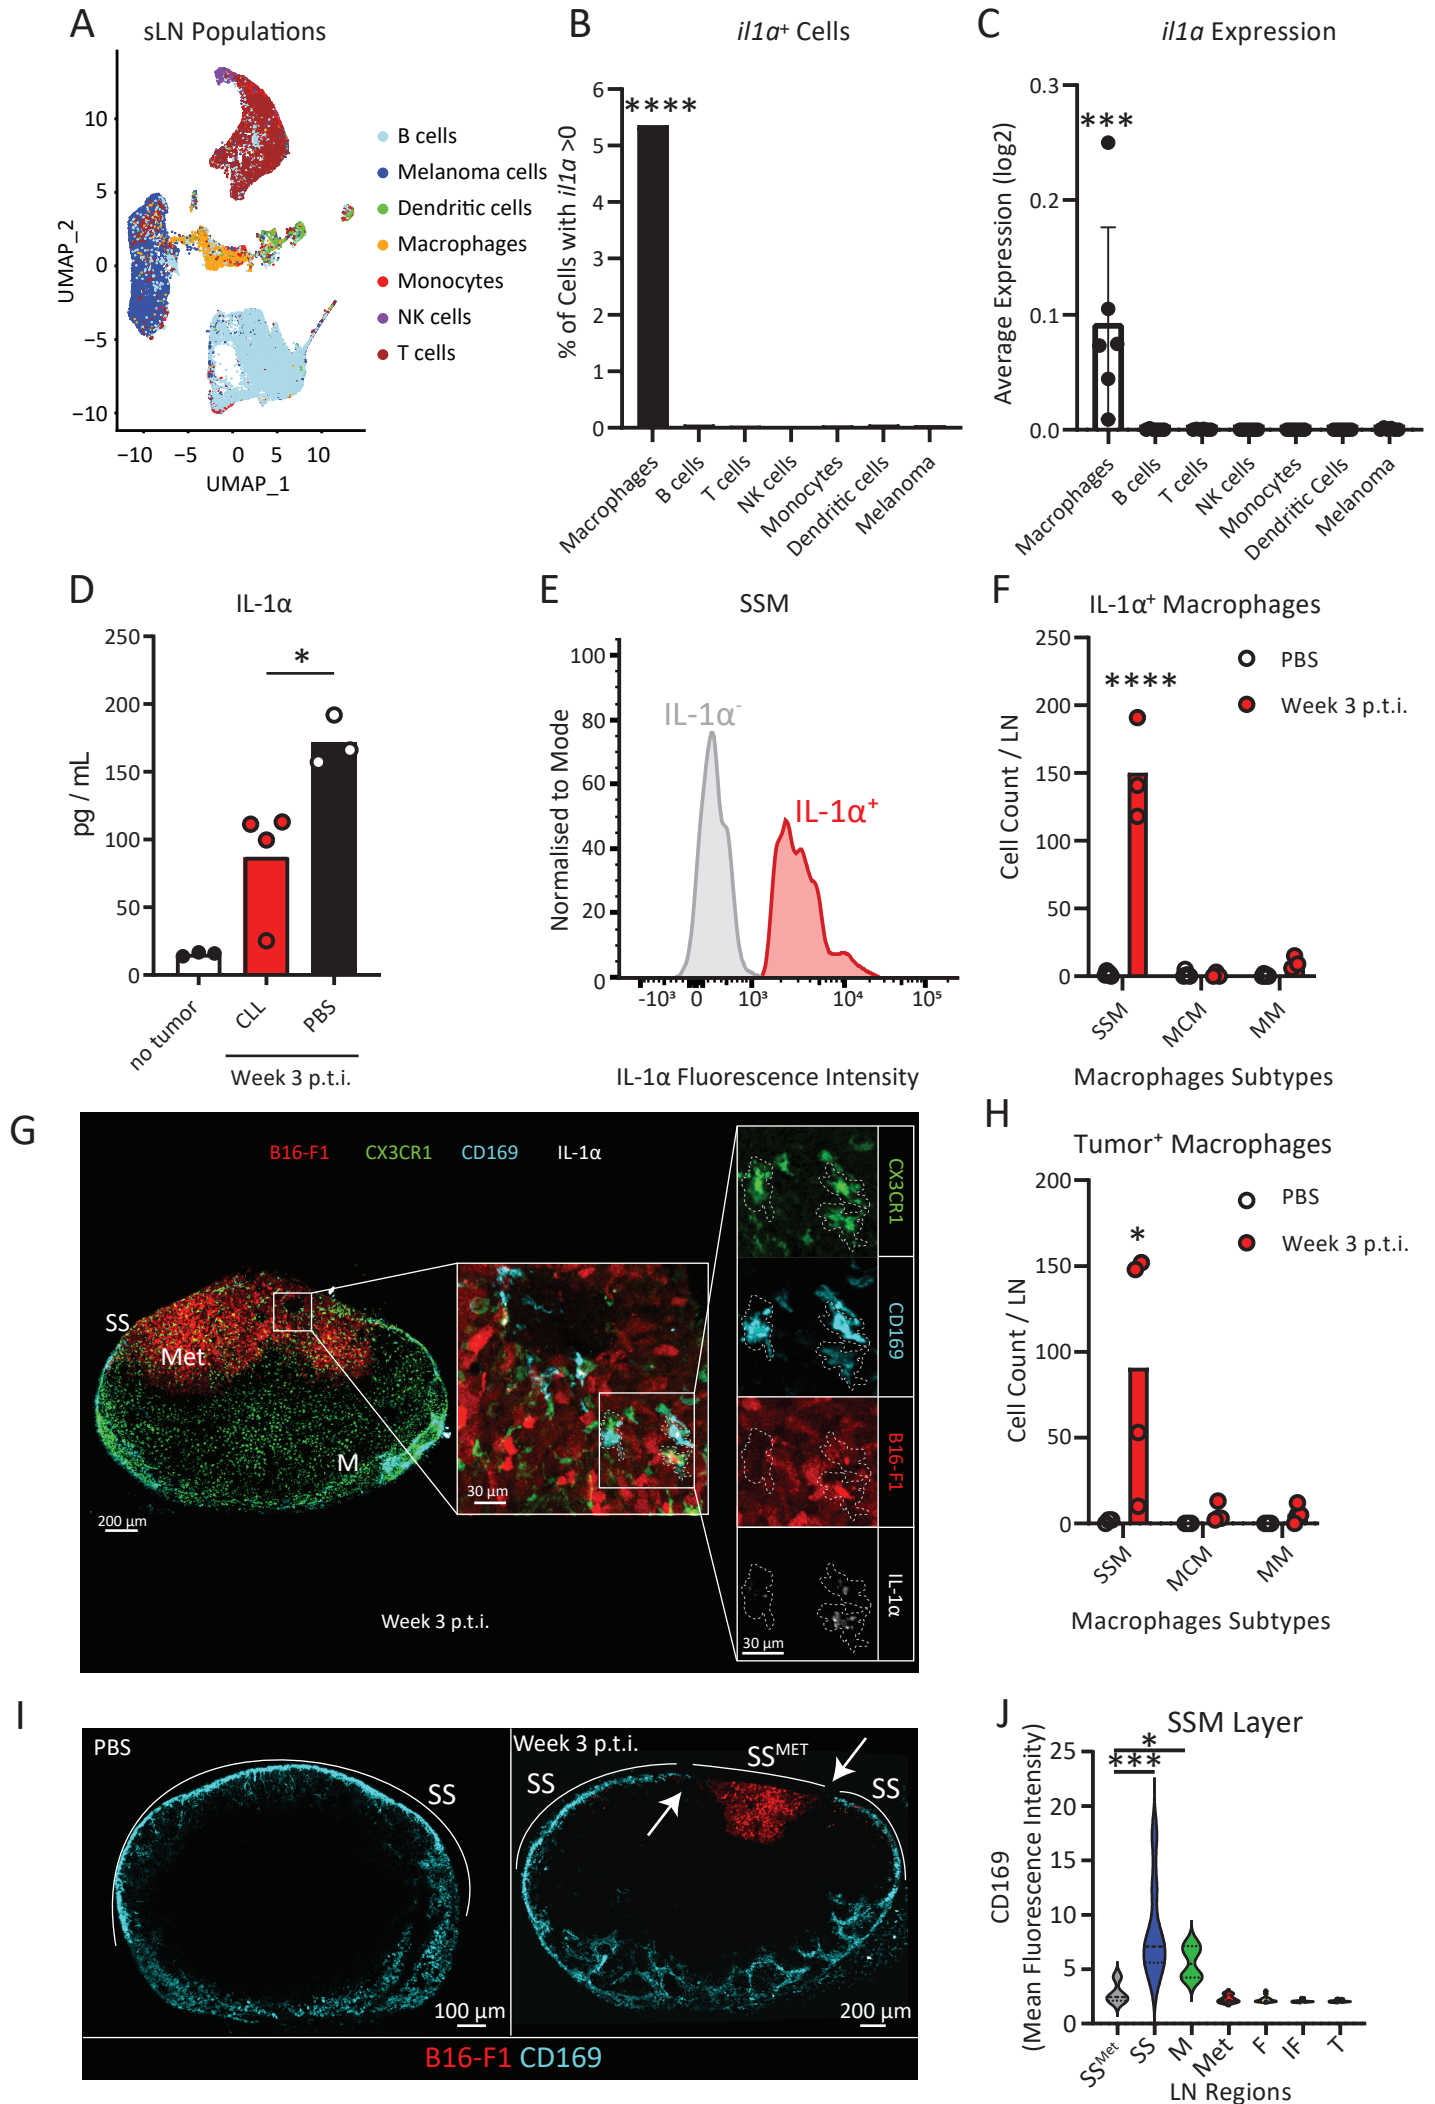

## Figure 4. SSM derived IL-1 $\alpha$ directly supports tumor proliferation

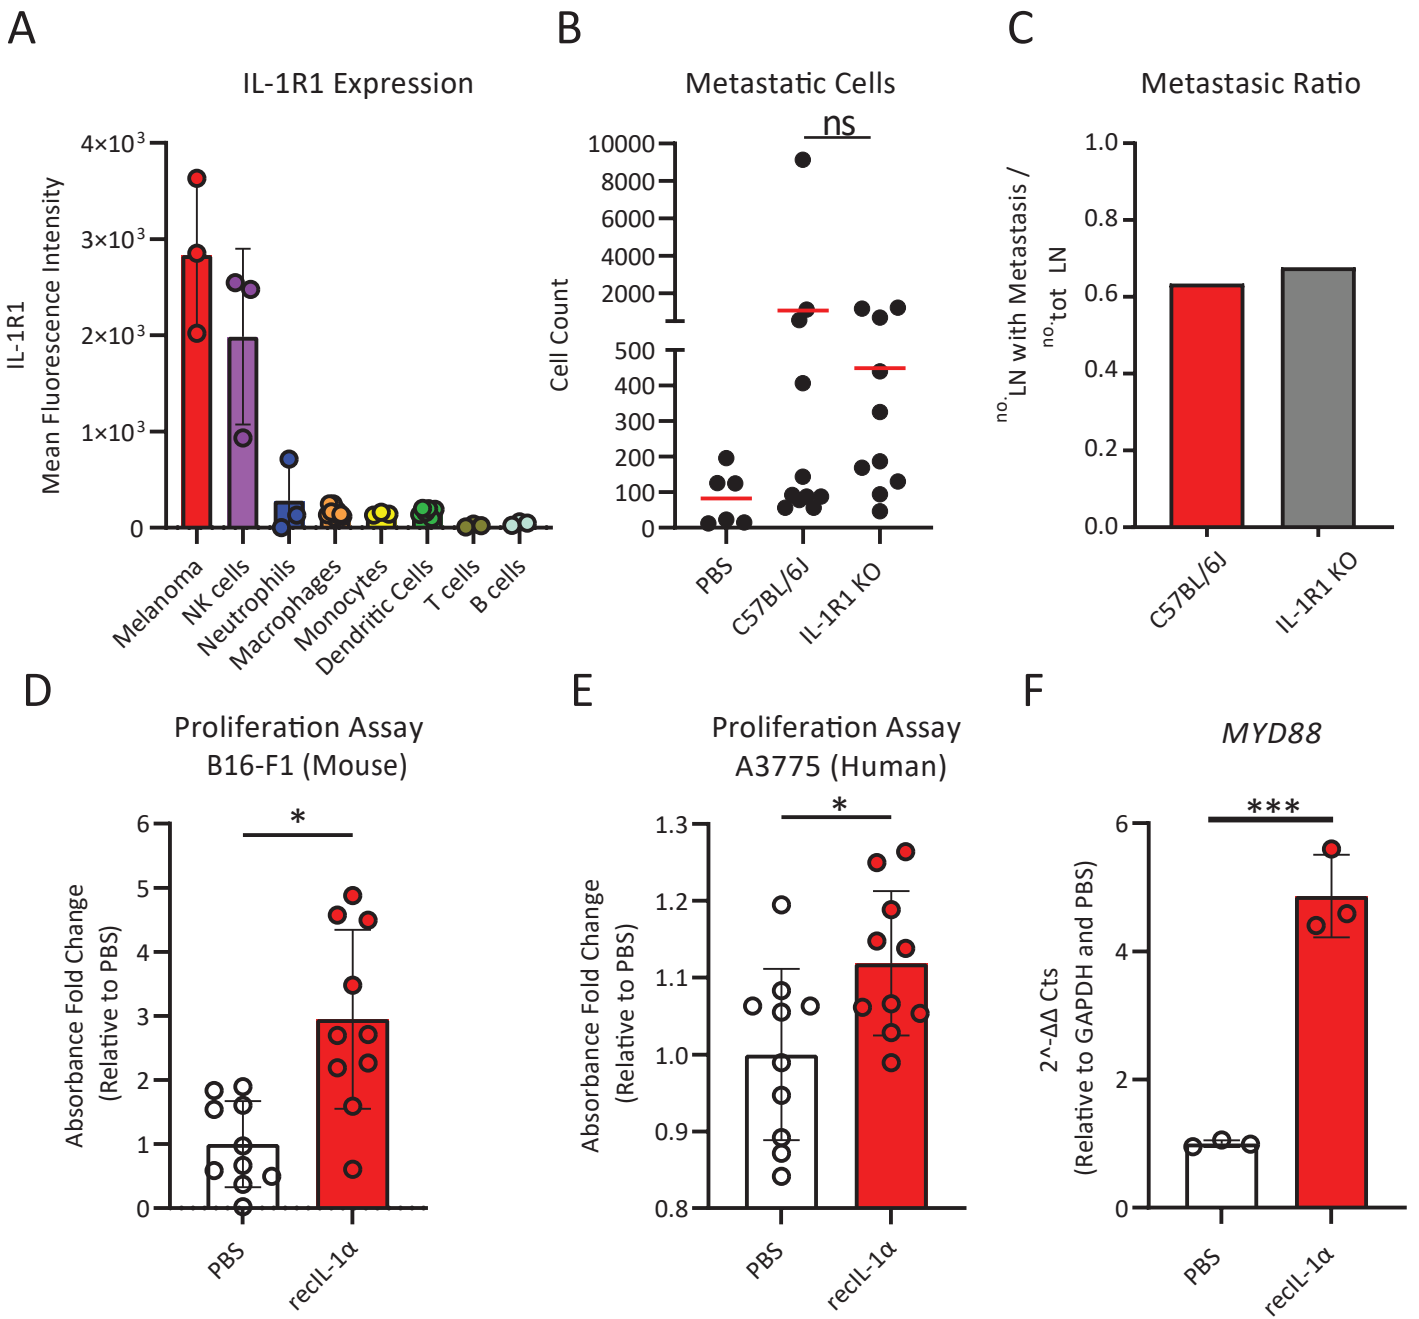

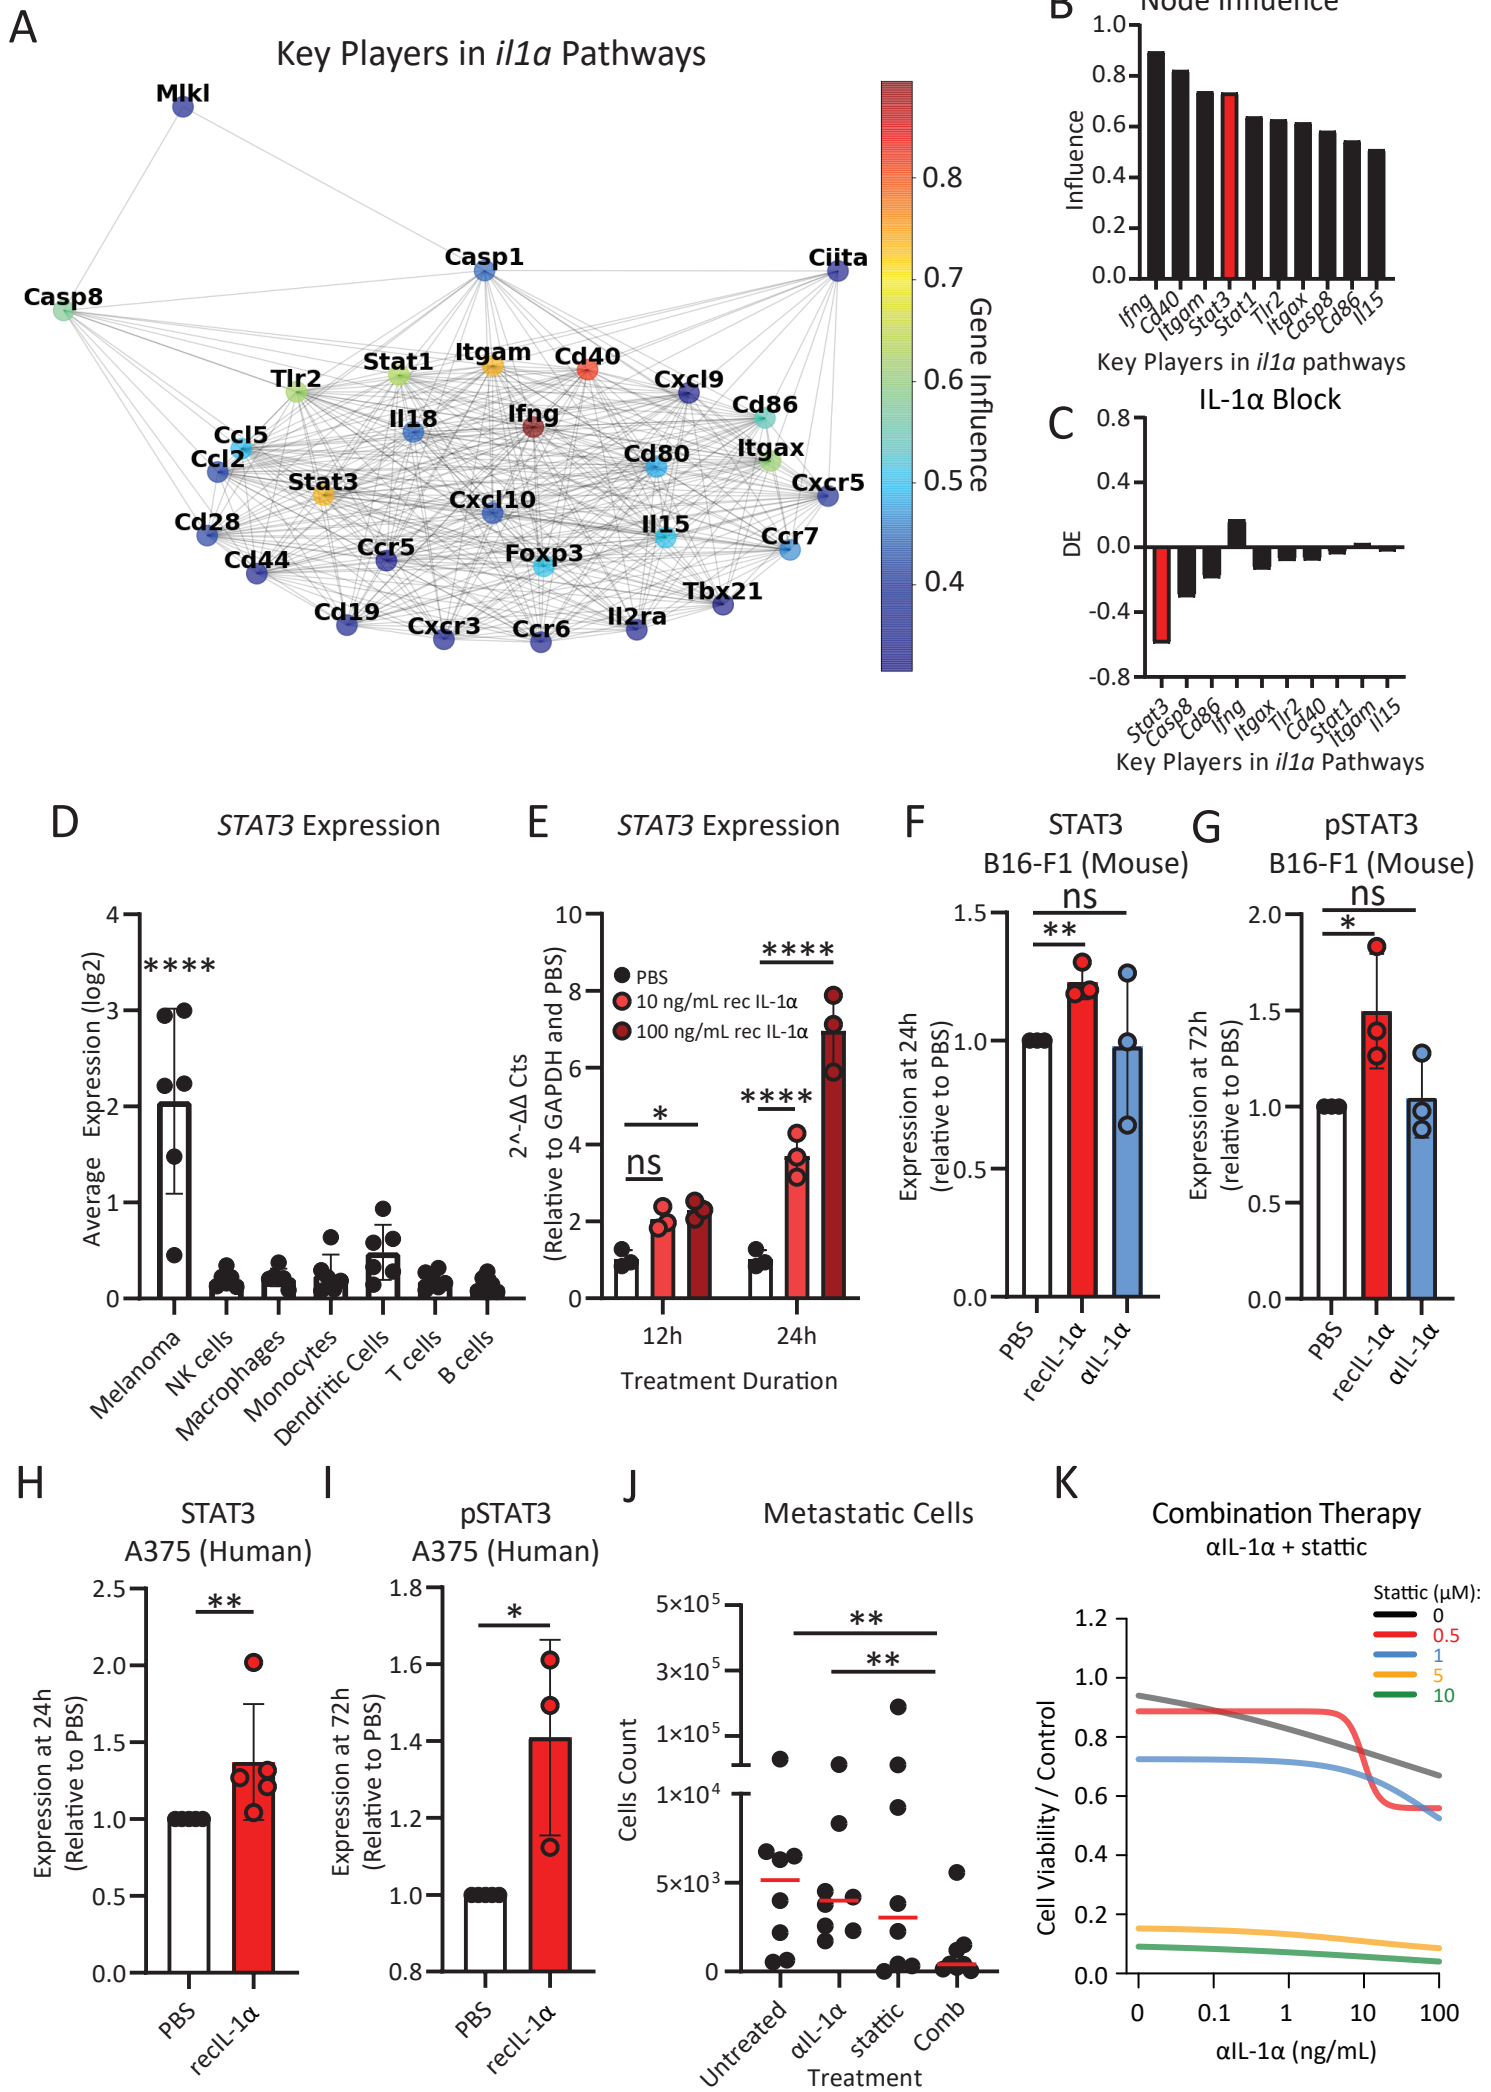

Source: https://www.biorxiv.org/content/biorxiv/early/2021/10/12/2021.10.11.463954.full.pdf
